# Supplementary material for: Unique Spatial Transcriptomic Profiling of the Murine Femoral Fracture Callus: A Preliminary Report
Source: MDPI journal article supplement (doi:10.3390/cells13060522), 2024-03-16
Supplement: s1 [file s1]

**Supplementary Table S1.** Sample quality.

| <b>Sample</b>    | <b>Number of Reads</b> | <b>Valid UMIs</b> | <b>Reads Mapped to Probe Set</b> | <b>Fraction Reads in Spots under Tissue</b> | <b>Mean Reads per Spot</b> | <b>Median UMI Counts per Spot</b> | <b>Median Genes per Spot</b> | <b>Genes Detected</b> |
|------------------|------------------------|-------------------|----------------------------------|---------------------------------------------|----------------------------|-----------------------------------|------------------------------|-----------------------|
| 1 Week MDA231    | 263,182,368            | 100.0%            | 98.6%                            | 98.9%                                       | 47,089                     | 855                               | 447                          | 15,533                |
| 2 Week MDA231    | 320,224,301            | 100.0%            | 98.3%                            | 97.7%                                       | 49,077                     | 651                               | 347                          | 16,281                |
| 2 Week Wild-Type | 254,517,220            | 100.0%            | 98.5%                            | 98.6%                                       | 46,293                     | 676                               | 392                          | 15,823                |

**Supplementary Table S2.** Unsupervised global gene clustering. Top expressed genes of each cluster sorted by p-value for the two-week wild-type sample.

| Top features | Cluster 1 | p-value   | fold change | Cluster 2 | p-value  | fold change | Cluster 3 | p-value  | fold change | Cluster 4 | p-value  | fold change | Cluster 5 | p-value   | fold change |
|--------------|-----------|-----------|-------------|-----------|----------|-------------|-----------|----------|-------------|-----------|----------|-------------|-----------|-----------|-------------|
| 1            | Bglap     | 8.86E-104 | 13.04       | Col2a1    | 7.19E-44 | 3.88        | Tim p2    | 1.08E-69 | 19.77       | Tmc c2    | 4.51E-51 | 1.72        | Il1rn     | 2.79E-110 | 93.25       |
| 2            | Colla1    | 1.84E-68  | 3.71        | F13a1     | 5.94E-41 | 28.49       | Igfb p7   | 7.87E-49 | 5.58        | Igh m     | 9.86E-49 | 1.50        | Fth1      | 1.62E-97  | 48.03       |
| 3            | Gja1      | 2.84E-67  | 11.79       | Comp      | 3.41E-37 | 3.43        | Igfb p5   | 1.65E-47 | 16.74       | Ank1      | 1.67E-37 | 1.95        | Ly6e      | 1.72E-65  | 16.22       |
| 4            | Acp5      | 6.81E-63  | 12.33       | Mgp       | 2.17E-36 | 4.96        | Mm p2     | 1.49E-43 | 6.38        | Acta1     | 7.89E-34 | 15.61       | Lgals3    | 2.00E-63  | 73.36       |
| 5            | Colla2    | 7.99E-55  | 2.37        | Cst3      | 1.82E-33 | 22.71       | Com p     | 3.19E-39 | 3.86        | Lcn2      | 3.58E-32 | 1.57        | Ctsl      | 1.44E-49  | 11.82       |
| 6            | Id3       | 4.34E-47  | 7.25        | Alpl      | 4.44E-26 | 4.11        | Bgn       | 7.66E-39 | 9.76        | Myh4      | 1.87E-28 | 20.71       | Psap      | 3.70E-43  | 14.96       |
| 7            | Tnc       | 1.06E-45  | 11.06       | Ibsp      | 4.89E-25 | 6.78        | Mxr a8    | 4.31E-38 | 8.89        | Ckm       | 5.46E-28 | 16.02       | Crip1     | 1.07E-42  | 15.51       |
| 8            | Ctsk      | 9.29E-41  | 6.86        | Phospho1  | 4.16E-23 | 9.35        | Tgfb i    | 3.40E-33 | 4.63        | Tnn c2    | 2.52E-27 | 12.12       | Tspo      | 4.25E-40  | 8.45        |
| 9            | Mmp9      | 1.99E-38  | 6.70        | Chil1     | 3.66E-19 | 10.70       | Apo e     | 1.44E-32 | 12.91       | Arh gdib  | 3.26E-27 | 1.77        | Bst2      | 4.36E-39  | 34.77       |
| 10           | Ckb       | 2.26E-37  | 7.06        | Ptp4a1    | 3.14E-18 | 4.79        | Col6 a3   | 2.81E-27 | 3.47        | Bpg m     | 7.66E-26 | 1.52        | Nfkb ia   | 2.20E-38  | 33.36       |
| 11           | Sparc     | 1.64E-34  | 6.07        | Fn1       | 1.47E-17 | 1.96        | Hspg2     | 2.46E-26 | 3.54        | Atp2 a1   | 9.29E-25 | 19.63       | Ctss      | 6.44E-37  | 11.55       |
| 12           | Col1a2    | 1.94E-34  | 2.83        | Pth1r     | 1.24E-15 | 5.48        | Col6 a2   | 5.76E-26 | 2.85        | Myl pf    | 1.10E-24 | 7.77        | Actb      | 1.49E-35  | 3.82        |
| 13           | Cfh       | 1.71E-32  | 8.58        | Gpc1      | 2.49E-13 | 3.78        | Lmn a     | 4.23E-25 | 5.02        | Ccn a2    | 3.99E-24 | 1.82        | Ctsd      | 2.39E-35  | 16.62       |
| 14           | Nrp2      | 7.88E-30  | 6.22        | Chst12    | 1.27E-09 | 2.06        | Cebp d    | 6.64E-25 | 4.89        | Cyb b     | 7.37E-24 | 1.83        | Txn1      | 1.13E-32  | 11.03       |

|    |          |          |       |         |            |      |        |          |      |          |          |       |        |          |       |
|----|----------|----------|-------|---------|------------|------|--------|----------|------|----------|----------|-------|--------|----------|-------|
| 15 | Satb2    | 6.02E-29 | 5.91  | Timp3   | 3.00E-08   | 4.56 | Crip1  | 8.15E-25 | 2.85 | Tnnt3    | 3.87E-23 | 13.14 | S100a6 | 1.04E-31 | 4.83  |
| 16 | Coll1a1  | 2.12E-26 | 5.55  | Gpx3    | 3.19E-08   | 2.18 | Lsp1   | 3.24E-23 | 2.16 | Fam111a  | 2.08E-22 | 1.51  | Vim    | 3.60E-31 | 12.24 |
| 17 | Csflr    | 4.43E-26 | 13.51 | Ckap4   | 4.36E-07   | 3.16 | Ctsl   | 4.93E-23 | 3.55 | Pygl     | 2.10E-22 | 1.64  | B2m    | 5.78E-30 | 3.24  |
| 18 | Serpinf1 | 5.36E-23 | 4.31  | Lman1   | 1.25E-06   | 2.98 | Ski    | 1.65E-22 | 6.08 | Pf4      | 5.02E-22 | 1.59  | Tapbp  | 6.48E-30 | 10.90 |
| 19 | Lifr     | 1.25E-21 | 4.82  | Pgam1   | 5.05E-06   | 3.25 | Gpx3   | 3.34E-22 | 3.02 | Pvalb    | 8.67E-21 | 20.72 | Cd44   | 1.42E-29 | 9.67  |
| 20 | Car3     | 8.88E-21 | 1.61  | Sdc4    | 1.60E-05   | 3.07 | Lgals1 | 4.22E-21 | 4.69 | Pdcd4    | 4.69E-19 | 1.63  | Ifitm3 | 4.52E-29 | 11.51 |
| 21 | Jdp2     | 1.49E-19 | 5.67  | Fxyd1   | 2.36E-05   | 1.78 | Fn1    | 1.05E-20 | 2.38 | Ttn      | 1.94E-16 | 7.66  | Tgm2   | 2.07E-28 | 13.54 |
| 22 | Slc4a2   | 2.30E-18 | 9.58  | Rcn3    | 3.48E-05   | 2.54 | Col5a1 | 4.07E-20 | 2.76 | Prkcb    | 7.56E-16 | 1.52  | Ctsb   | 2.25E-27 | 11.10 |
| 23 | Hexa     | 5.06E-17 | 3.78  | Clint1  | 2.04E-04   | 2.30 | Clu    | 6.22E-20 | 7.43 | Eno3     | 1.42E-15 | 10.99 | Esd    | 6.66E-27 | 16.05 |
| 24 | Hexb     | 9.40E-17 | 11.77 | Scp2    | 6.28E-04   | 1.74 | Mgp    | 7.51E-20 | 2.44 | Ptprc    | 3.00E-15 | 2.31  | Cyba   | 9.37E-26 | 2.32  |
| 25 | Prex1    | 3.38E-14 | 5.41  | Rpn1    | 6.67E-04   | 1.91 | Cd81   | 3.50E-19 | 8.25 | Cd74     | 3.23E-15 | 1.65  | Tagln2 | 4.35E-24 | 3.55  |
| 26 | Arsb     | 1.84E-09 | 8.05  | Npm1    | 7.17E-04   | 1.56 | Vim    | 4.80E-19 | 2.79 | Hnrnpul1 | 8.18E-15 | 1.54  | Ctsz   | 2.05E-23 | 9.61  |
| 27 | Bmp1     | 3.71E-09 | 1.94  | Mif     | 0.00105478 | 1.77 | Lum    | 1.04E-18 | 3.74 | Alox5ap  | 1.15E-13 | 1.64  | Fcerlg | 2.79E-23 | 2.75  |
| 28 | Tns3     | 3.82E-09 | 2.84  | Hnrnpab | 0.00124852 | 1.66 | Csrp1  | 1.44E-17 | 4.75 | Rad23a   | 1.56E-13 | 2.21  | Junb   | 7.83E-23 | 10.11 |

|    |                  |              |      |                       |                    |      |            |              |      |             |              |      |             |              |       |
|----|------------------|--------------|------|-----------------------|--------------------|------|------------|--------------|------|-------------|--------------|------|-------------|--------------|-------|
| 29 | Atp6<br>v1e1     | 5.33E<br>-09 | 3.23 | Serpinh<br>1          | 0.001<br>3553<br>4 | 2.20 | Mtch<br>1  | 7.65E<br>-17 | 5.82 | Anx<br>a1   | 1.71E<br>-12 | 1.65 | C3          | 1.35E<br>-22 | 12.61 |
| 30 | Plxnd<br>1       | 6.13E<br>-08 | 2.93 | Hspg2                 | 0.002<br>7999<br>3 | 1.50 | Col3<br>a1 | 7.92E<br>-17 | 1.98 | Ybx<br>3    | 7.10E<br>-12 | 2.10 | Itgb2       | 2.25E<br>-22 | 4.31  |
| 31 | Tme<br>m176<br>b | 8.83E<br>-08 | 2.53 | Rpn2                  | 0.006<br>6275<br>1 | 1.71 | Col2<br>a1 | 1.88E<br>-14 | 2.23 | Gda         | 1.07E<br>-11 | 1.55 | Cd30<br>0lf | 2.49E<br>-22 | 3.69  |
| 32 | Tcirg<br>1       | 1.02E<br>-07 | 2.82 | Dynlrb1               | 0.009<br>9381      | 2.48 | Jund       | 1.94E<br>-14 | 4.26 | Myl<br>1    | 1.26E<br>-10 | 3.08 | Gpx1        | 4.74E<br>-22 | 1.54  |
| 33 | Atp5<br>g3       | 1.37E<br>-07 | 2.03 | Fgfr1                 | 0.012<br>6394      | 1.65 | Ctss       | 8.45E<br>-14 | 4.08 | Pfk<br>m    | 2.84E<br>-10 | 4.90 | Tgfb1       | 7.20E<br>-22 | 5.71  |
| 34 | Pck2             | 1.67E<br>-07 | 1.55 | Vcl                   | 0.024<br>5966<br>4 | 2.02 | Col4<br>a1 | 2.84E<br>-12 | 3.05 | Gpi1        | 3.94E<br>-10 | 2.22 | Selpl<br>g  | 1.56E<br>-21 | 2.30  |
| 35 | Serpi<br>ne2     | 2.47E<br>-07 | 1.68 | Eprs                  | 0.030<br>7776<br>1 | 3.14 | App        | 2.98E<br>-12 | 3.71 | Tpm<br>1    | 7.61E<br>-10 | 5.62 | Slpi        | 1.04E<br>-20 | 4.44  |
| 36 | Atp6<br>v0c      | 4.14E<br>-07 | 3.17 | Ndufb6                | 0.033<br>9800<br>1 | 1.58 | Rgs2       | 4.95E<br>-12 | 7.62 | Tpm<br>2    | 3.38E<br>-08 | 3.03 | Cd36        | 1.02E<br>-19 | 4.90  |
| 37 | Atp6<br>v1f      | 8.50E<br>-07 | 1.77 | Selenoh               | 0.034<br>7924<br>9 | 1.67 | Gas6       | 1.27E<br>-11 | 1.89 | Seri<br>nc3 | 1.20E<br>-07 | 2.49 | Srgn        | 2.57E<br>-19 | 2.15  |
| 38 | Mdh1             | 1.47E<br>-06 | 1.74 | 231002<br>2B05Ri<br>k | 0.042<br>1351<br>1 | 2.41 | Slc6<br>a6 | 2.39E<br>-11 | 3.42 | Pyg<br>m    | 1.44E<br>-07 | 3.81 | Plac8       | 4.90E<br>-19 | 1.85  |
| 39 | Itgb3            | 1.65E<br>-06 | 1.98 | Brd3                  | 0.048<br>5360<br>3 | 1.77 | S100<br>a6 | 3.35E<br>-11 | 1.69 | Myh<br>1    | 3.20E<br>-07 | 6.98 | Ahna<br>k   | 6.16E<br>-19 | 11.53 |

|    |                  |              |      |              |                    |      |              |              |      |             |              |      |            |              |       |
|----|------------------|--------------|------|--------------|--------------------|------|--------------|--------------|------|-------------|--------------|------|------------|--------------|-------|
| 40 | Edem<br>l        | 2.76E<br>-06 | 1.76 | Cuedc2       | 0.057<br>5265<br>8 | 1.67 | Ctsb         | 1.98E<br>-10 | 2.34 | Hnr<br>npk  | 1.52E<br>-06 | 1.86 | Spp1       | 1.77E<br>-18 | 8.18  |
| 41 | Cycl             | 7.75E<br>-06 | 1.63 | Ebna1b<br>p2 | 0.059<br>6127<br>7 | 1.70 | Col4<br>a3bp | 4.88E<br>-10 | 4.74 | Bsg         | 1.67E<br>-06 | 1.64 | Stx1<br>1  | 5.32E<br>-18 | 2.73  |
| 42 | Pcolc<br>e       | 8.52E<br>-06 | 1.64 | Rabac1       | 0.083<br>3374<br>2 | 1.95 | Mt1          | 5.44E<br>-10 | 2.07 | Myo<br>1f   | 2.30E<br>-06 | 1.75 | Cd68       | 8.80E<br>-18 | 8.03  |
| 43 | Atp1<br>al       | 1.10E<br>-05 | 1.57 | Mapk3        | 0.101<br>3885<br>1 | 1.82 | Plva<br>p    | 9.48E<br>-10 | 3.96 | Flna        | 2.71E<br>-06 | 1.88 | Rap1<br>b  | 2.18E<br>-17 | 2.42  |
| 44 | Ahcy<br>ll       | 1.86E<br>-05 | 2.40 | Srp9         | 0.113<br>1749<br>1 | 1.63 | Thbs<br>1    | 1.02E<br>-09 | 2.30 | Car3        | 1.29E<br>-05 | 4.53 | H2-<br>K1  | 3.85E<br>-17 | 12.86 |
| 45 | Fgfr1            | 2.01E<br>-05 | 1.58 | Kdelr2       | 0.117<br>3278<br>2 | 1.59 | Cxcl<br>14   | 1.12E<br>-09 | 2.61 | Cyb<br>5a   | 1.43E<br>-05 | 1.74 | Hk3        | 4.15E<br>-17 | 2.06  |
| 46 | Mmp<br>13        | 3.47E<br>-05 | 2.19 | Slpi         | 0.131<br>7769<br>9 | 2.69 | Col5<br>a2   | 2.82E<br>-09 | 1.92 | Gsr         | 2.18E<br>-05 | 1.79 | Tap2       | 4.99E<br>-17 | 2.91  |
| 47 | Tme<br>m176<br>a | 9.15E<br>-05 | 1.69 | Swi5         | 0.195<br>4486<br>6 | 1.53 | B4ga<br>lt1  | 3.75E<br>-09 | 2.04 | Myb<br>pc2  | 4.15E<br>-05 | 2.69 | Sqst<br>m1 | 1.22E<br>-16 | 8.09  |
| 48 | Lapt<br>m5       | 9.74E<br>-05 | 1.59 | Mbnl1        | 0.223<br>7195<br>5 | 1.74 | Il6st        | 5.60E<br>-09 | 7.63 | Aldo<br>a   | 4.48E<br>-05 | 4.19 | Lmn<br>a   | 4.12E<br>-16 | 5.32  |
| 49 | Ctsa             | 1.23E<br>-04 | 2.16 | Hpcal1       | 0.234<br>1025<br>5 | 1.57 | Slc4<br>0a1  | 8.17E<br>-09 | 2.14 | Lam<br>tor4 | 4.87E<br>-05 | 1.68 | S100<br>a4 | 4.59E<br>-16 | 16.64 |
| 50 | Kctd<br>12       | 1.29E<br>-04 | 1.88 | Slc25a5      | 0.244<br>3854<br>8 | 1.67 | Ubc          | 4.20E<br>-08 | 1.73 | Ezr         | 1.59E<br>-04 | 1.66 | Fcgr<br>3  | 4.77E<br>-16 | 2.25  |

|    |             |                    |      |              |                    |      |             |              |      |             |                    |      |              |              |      |
|----|-------------|--------------------|------|--------------|--------------------|------|-------------|--------------|------|-------------|--------------------|------|--------------|--------------|------|
| 51 | Cd63        | 2.57E<br>-04       | 1.59 | Mapk14       | 0.315<br>1853<br>7 | 1.63 | Anx<br>a5   | 5.77E<br>-08 | 2.93 | H2-<br>Eb1  | 2.59E<br>-04       | 1.55 | Tnfrs<br>fla | 6.00E<br>-16 | 7.80 |
| 52 | Atp6<br>v0b | 2.60E<br>-04       | 1.55 | Ppp3ca       | 0.335<br>2156<br>2 | 2.16 | Zyx         | 9.23E<br>-08 | 1.53 | B2m         | 5.97E<br>-04       | 1.68 | Plec         | 7.08E<br>-16 | 4.33 |
| 53 | Cox6<br>a1  | 3.68E<br>-04       | 1.73 | Psmb4        | 0.352<br>9149<br>2 | 1.56 | Ptms        | 1.09E<br>-07 | 2.51 | Cdc<br>a4   | 0.001<br>0339      | 1.61 | Smo<br>x     | 8.08E<br>-16 | 5.12 |
| 54 | Selen<br>op | 4.70E<br>-04       | 1.52 | Serpine<br>2 | 0.441<br>6941<br>6 | 1.78 | Nfe2<br>l1  | 3.37E<br>-07 | 3.85 | H2af<br>z   | 0.001<br>1485<br>1 | 1.62 | Cfl1         | 1.22E<br>-15 | 2.73 |
| 55 | Sdhb        | 6.98E<br>-04       | 1.62 | Casp3        | 0.532<br>1376<br>3 | 1.78 | Mbt<br>ps1  | 4.52E<br>-07 | 1.85 | Cnp         | 0.001<br>4455<br>8 | 1.56 | Nadk         | 1.60E<br>-15 | 5.91 |
| 56 | Srsf9       | 0.002<br>7798<br>4 | 1.54 | Snf8         | 0.536<br>7066<br>8 | 2.40 | Ww<br>p2    | 6.05E<br>-07 | 3.04 | Dnm<br>t1   | 0.002<br>9059<br>5 | 4.03 | Lgals<br>9   | 1.67E<br>-15 | 3.08 |
| 57 | Parvb       | 0.003<br>4697<br>1 | 2.38 | Casq1        | 0.538<br>2353<br>8 | 2.79 | Upf1        | 1.28E<br>-06 | 2.93 | Srsf<br>11  | 0.004<br>017       | 8.98 | Grn          | 3.56E<br>-15 | 6.62 |
| 58 | Gusb        | 0.006<br>6241      | 2.92 | Usf2         | 0.590<br>9362<br>4 | 1.60 | Prka<br>cb  | 1.63E<br>-06 | 5.07 | Tra<br>m1   | 0.004<br>2758<br>3 | 1.54 | H3f3<br>b    | 5.48E<br>-15 | 2.30 |
| 59 | Mgat<br>4b  | 0.012<br>4339<br>1 | 2.35 | Calm2        | 0.652<br>0762<br>2 | 1.59 | Lapt<br>m4a | 1.86E<br>-06 | 1.54 | Atp5<br>a1  | 0.005<br>4682      | 1.58 | Npc2         | 6.07E<br>-15 | 2.95 |
| 60 | Ak2         | 0.018<br>4895<br>4 | 1.69 | Atp2c1       | 0.703<br>4400<br>8 | 1.53 | Junb        | 1.86E<br>-06 | 2.23 | Trir        | 0.007<br>3026<br>7 | 1.86 | Aldh<br>3b1  | 1.00E<br>-14 | 3.03 |
| 61 | Sec6<br>la1 | 0.018<br>9632<br>2 | 1.51 | Stx4a        | 0.748<br>4193<br>2 | 3.41 | Fabp<br>4   | 2.13E<br>-06 | 2.31 | Slc4<br>8a1 | 0.007<br>4757<br>5 | 1.55 | Sod2         | 1.23E<br>-14 | 9.14 |

|    |             |                    |      |             |                    |      |              |              |      |            |                    |      |             |              |      |
|----|-------------|--------------------|------|-------------|--------------------|------|--------------|--------------|------|------------|--------------------|------|-------------|--------------|------|
| 62 | Atp6<br>v0e | 0.019<br>7409<br>7 | 2.08 | Xpnpep<br>1 | 0.754<br>3726<br>1 | 1.77 | Sdf2         | 2.39E<br>-06 | 1.95 | Ube<br>2s  | 0.008<br>9622<br>1 | 1.93 | Alox<br>5ap | 1.42E<br>-14 | 1.77 |
| 63 | Scan<br>d1  | 0.031<br>0617<br>4 | 1.51 | Mt1         | 0.825<br>4511<br>5 | 1.51 | Ana<br>pc5   | 2.45E<br>-06 | 1.65 | Ywh<br>az  | 0.009<br>9959<br>3 | 1.68 | Btg1        | 1.63E<br>-14 | 3.14 |
| 64 | Sh3k<br>bp1 | 0.034<br>3719<br>5 | 1.74 | Lyn         | 0.879<br>2745<br>6 | 4.14 | Orai<br>1    | 2.52E<br>-06 | 1.63 | Ubr<br>3   | 0.017<br>7261<br>6 | 1.54 | Clic1       | 1.74E<br>-14 | 3.75 |
| 65 | Map2<br>k3  | 0.049<br>4689      | 1.50 | Maf         | 0.906<br>9210<br>1 | 1.89 | Ctsd         | 2.65E<br>-06 | 2.25 | Mpc<br>2   | 0.028<br>5457<br>8 | 1.52 | Gna1<br>3   | 1.83E<br>-14 | 3.83 |
| 66 | Vapa        | 0.080<br>8290<br>5 | 1.59 | Uba2        | 0.926<br>8809<br>4 | 1.54 | Eng          | 2.86E<br>-06 | 2.55 | Gtf2<br>i  | 0.039<br>2164<br>5 | 2.87 | Fxyd<br>5   | 1.91E<br>-14 | 5.52 |
| 67 | Crebz<br>f  | 0.089<br>0157<br>7 | 1.95 |             |                    |      | Colg<br>alt1 | 4.10E<br>-06 | 3.30 | Skp<br>1a  | 0.039<br>6289<br>2 | 1.78 | Litaf       | 2.74E<br>-14 | 3.98 |
| 68 | Oxct<br>1   | 0.145<br>4443<br>6 | 2.03 |             |                    |      | Anx<br>a6    | 5.24E<br>-06 | 2.41 | Oaz<br>1   | 0.184<br>6284<br>9 | 1.87 | Msn         | 4.08E<br>-14 | 4.11 |
| 69 | Naa5<br>0   | 0.253<br>9117<br>7 | 1.78 |             |                    |      | Sptb<br>n1   | 6.79E<br>-06 | 1.67 | Myl<br>12a | 0.283<br>5835<br>1 | 2.37 | Msrb<br>1   | 4.35E<br>-14 | 1.81 |
| 70 | Dcaf<br>12  | 0.271<br>8793<br>7 | 1.62 |             |                    |      | Tsc2<br>2d3  | 8.36E<br>-06 | 1.90 | Mga<br>t1  | 0.382<br>2569<br>9 | 1.57 | Esyt<br>1   | 7.28E<br>-14 | 2.38 |
| 71 | Bex3        | 0.304<br>1756<br>3 | 2.72 |             |                    |      | Sdc4         | 9.29E<br>-06 | 1.95 | Hnr<br>npm | 0.387<br>9031<br>4 | 1.74 | Ezr         | 2.53E<br>-13 | 3.04 |
| 72 | Actr1<br>a  | 0.320<br>4810<br>3 | 2.66 |             |                    |      | Cdc4<br>2se1 | 1.73E<br>-05 | 5.94 | Sfpq       | 0.398<br>2879<br>3 | 1.91 | Tyro<br>bp  | 1.54E<br>-12 | 2.38 |

|    |          |                    |      |  |  |  |         |              |      |          |                    |      |         |              |      |
|----|----------|--------------------|------|--|--|--|---------|--------------|------|----------|--------------------|------|---------|--------------|------|
| 73 | Tmem131  | 0.342<br>7333<br>8 | 1.64 |  |  |  | Myolc   | 1.90E<br>-05 | 1.61 | Ifitm3   | 0.490<br>691       | 2.45 | Cd47    | 1.84E<br>-12 | 1.96 |
| 74 | Cbx1     | 0.365<br>3231<br>5 | 1.56 |  |  |  | Cbfb    | 2.82E<br>-05 | 2.39 | Plec     | 0.503<br>2512<br>5 | 2.11 | Btg2    | 2.82E<br>-12 | 1.79 |
| 75 | Prdx4    | 0.387<br>9852<br>4 | 1.89 |  |  |  | Ccnl2   | 3.93E<br>-05 | 2.20 | Numal    | 0.568<br>8083<br>5 | 2.43 | Cd52    | 3.65E<br>-12 | 1.65 |
| 76 | Nisch    | 0.406<br>3098<br>2 | 1.54 |  |  |  | Tcp1l12 | 4.64E<br>-05 | 1.85 | Colgalt1 | 0.667<br>7135<br>8 | 1.58 | Mpeg1   | 3.77E<br>-12 | 3.09 |
| 77 | Macf1    | 0.457<br>3818      | 1.70 |  |  |  | Tmem165 | 5.00E<br>-05 | 1.50 | Wwp2     | 0.741<br>9120<br>4 | 1.62 | Psme1   | 3.88E<br>-12 | 2.38 |
| 78 | Ndufs4   | 0.459<br>2960<br>6 | 1.78 |  |  |  | Cat     | 5.63E<br>-05 | 1.55 | Rer1     | 0.989<br>5598<br>9 | 4.37 | Anxa2   | 4.69E<br>-12 | 3.27 |
| 79 | R3hdm4   | 0.543<br>7674<br>4 | 1.53 |  |  |  | Ostf1   | 8.61E<br>-05 | 1.68 |          |                    |      | Calm1   | 8.02E<br>-12 | 3.71 |
| 80 | Rgl2     | 0.574<br>7811<br>1 | 2.83 |  |  |  | Adipor1 | 1.02E<br>-04 | 3.33 |          |                    |      | Plekho2 | 1.80E<br>-11 | 2.50 |
| 81 | Bclaf1   | 0.630<br>6403      | 2.40 |  |  |  | Lamp1   | 2.69E<br>-04 | 2.58 |          |                    |      | Mxd1    | 2.91E<br>-11 | 2.29 |
| 82 | Eif4ebp1 | 0.750<br>5554<br>2 | 1.60 |  |  |  | Tapbp   | 2.85E<br>-04 | 1.69 |          |                    |      | Myo1f   | 3.69E<br>-11 | 2.99 |
| 83 | Nktr     | 0.870<br>5181<br>6 | 2.30 |  |  |  | Fcgr3   | 2.92E<br>-04 | 1.71 |          |                    |      | Grina   | 4.24E<br>-11 | 1.91 |



|    |      |               |      |  |  |  |              |                    |      |  |  |  |                  |              |       |
|----|------|---------------|------|--|--|--|--------------|--------------------|------|--|--|--|------------------|--------------|-------|
| 84 | Preb | 0.950<br>8834 | 1.52 |  |  |  | Raba<br>c1   | 2.94E<br>-04       | 2.49 |  |  |  | Sdcb<br>p        | 6.18E<br>-11 | 1.91  |
| 85 |      |               |      |  |  |  | Cct3         | 3.19E<br>-04       | 1.86 |  |  |  | Apbb<br>lip      | 1.45E<br>-10 | 1.93  |
| 86 |      |               |      |  |  |  | Prre<br>2a   | 3.54E<br>-04       | 1.69 |  |  |  | Myl1<br>2a       | 1.57E<br>-10 | 4.99  |
| 87 |      |               |      |  |  |  | Actn<br>1    | 3.97E<br>-04       | 3.93 |  |  |  | Col6<br>a3       | 1.58E<br>-10 | 2.85  |
| 88 |      |               |      |  |  |  | Traf<br>7    | 4.55E<br>-04       | 2.37 |  |  |  | Pkm              | 1.95E<br>-10 | 2.41  |
| 89 |      |               |      |  |  |  | Ywh<br>aq    | 6.14E<br>-04       | 2.63 |  |  |  | Csf3r            | 2.94E<br>-10 | 10.33 |
| 90 |      |               |      |  |  |  | Rnh<br>1     | 6.35E<br>-04       | 1.88 |  |  |  | Capz<br>a2       | 3.17E<br>-10 | 3.55  |
| 91 |      |               |      |  |  |  | Sh3p<br>xd2b | 8.82E<br>-04       | 2.05 |  |  |  | Gch1             | 3.34E<br>-10 | 1.52  |
| 92 |      |               |      |  |  |  | Lim<br>d1    | 9.00E<br>-04       | 1.56 |  |  |  | Pfn1             | 3.67E<br>-10 | 1.72  |
| 93 |      |               |      |  |  |  | Plpp<br>3    | 9.19E<br>-04       | 2.64 |  |  |  | Capg             | 5.82E<br>-10 | 3.33  |
| 94 |      |               |      |  |  |  | Stk2<br>5    | 0.001<br>0955<br>2 | 1.58 |  |  |  | Arpc<br>3        | 1.00E<br>-09 | 1.99  |
| 95 |      |               |      |  |  |  | Rp2          | 0.001<br>2745<br>4 | 3.27 |  |  |  | Cxcl<br>14       | 1.02E<br>-09 | 7.21  |
| 96 |      |               |      |  |  |  | Epn1         | 0.002<br>0541<br>6 | 4.62 |  |  |  | Axl              | 1.57E<br>-09 | 7.62  |
| 97 |      |               |      |  |  |  | Slc2<br>5a4  | 0.002<br>0847<br>2 | 2.61 |  |  |  | BC0<br>0553<br>7 | 2.53E<br>-09 | 4.72  |

|     |  |  |  |  |  |  |            |                    |      |  |  |  |             |              |      |
|-----|--|--|--|--|--|--|------------|--------------------|------|--|--|--|-------------|--------------|------|
| 98  |  |  |  |  |  |  | Sar1<br>a  | 0.002<br>1554<br>2 | 2.08 |  |  |  | Slc1<br>4a1 | 2.56E<br>-09 | 1.53 |
| 99  |  |  |  |  |  |  | 2-<br>Sep  | 0.002<br>2191<br>3 | 1.64 |  |  |  | Mcl1        | 2.71E<br>-09 | 2.12 |
| 100 |  |  |  |  |  |  | Map<br>7d1 | 0.002<br>6352<br>9 | 2.07 |  |  |  | Igfbp<br>7  | 3.17E<br>-09 | 2.32 |
| 101 |  |  |  |  |  |  | Arf1       | 0.002<br>7756<br>5 | 1.81 |  |  |  | Myo<br>1c   | 3.27E<br>-09 | 4.56 |
| 102 |  |  |  |  |  |  | Tcp1       | 0.002<br>8770<br>1 | 1.91 |  |  |  | Gusb        | 6.57E<br>-09 | 2.18 |
| 103 |  |  |  |  |  |  | Ddx<br>6   | 0.003<br>0474<br>4 | 1.55 |  |  |  | Pical<br>m  | 8.43E<br>-09 | 8.90 |
| 104 |  |  |  |  |  |  | Wdr<br>61  | 0.003<br>3582<br>5 | 1.54 |  |  |  | Chm<br>p4b  | 9.47E<br>-09 | 7.55 |
| 105 |  |  |  |  |  |  | Fis1       | 0.003<br>6403      | 1.53 |  |  |  | Psmb<br>9   | 1.00E<br>-08 | 2.23 |
| 106 |  |  |  |  |  |  | Eif3<br>h  | 0.004<br>2976      | 2.01 |  |  |  | Tnfai<br>p2 | 1.18E<br>-08 | 5.93 |
| 107 |  |  |  |  |  |  | Gak        | 0.004<br>6333<br>9 | 2.19 |  |  |  | Atp6<br>ap2 | 1.91E<br>-08 | 2.18 |
| 108 |  |  |  |  |  |  | Rgcc       | 0.005<br>2166<br>5 | 4.05 |  |  |  | Prdx<br>5   | 1.93E<br>-08 | 2.02 |
| 109 |  |  |  |  |  |  | Dctn<br>3  | 0.005<br>3379      | 1.73 |  |  |  | Mdm<br>2    | 2.27E<br>-08 | 5.51 |

|     |  |  |  |  |  |  |            |                    |      |  |  |  |             |              |      |
|-----|--|--|--|--|--|--|------------|--------------------|------|--|--|--|-------------|--------------|------|
| 110 |  |  |  |  |  |  | Itgb1      | 0.006<br>2205<br>7 | 1.59 |  |  |  | Rnh1        | 4.52E<br>-08 | 7.42 |
| 111 |  |  |  |  |  |  | Msl1       | 0.006<br>4000<br>9 | 1.55 |  |  |  | Apoe        | 6.05E<br>-08 | 2.65 |
| 112 |  |  |  |  |  |  | Ptpa       | 0.006<br>8947<br>3 | 1.65 |  |  |  | Col6<br>a2  | 7.26E<br>-08 | 2.09 |
| 113 |  |  |  |  |  |  | Rab1<br>la | 0.007<br>0705      | 1.90 |  |  |  | Clec<br>2d  | 9.90E<br>-08 | 1.64 |
| 114 |  |  |  |  |  |  | Anx<br>a2  | 0.007<br>8292<br>8 | 1.55 |  |  |  | Glipr<br>2  | 1.03E<br>-07 | 4.34 |
| 115 |  |  |  |  |  |  | Klf1<br>3  | 0.009<br>1602<br>5 | 1.50 |  |  |  | Col4<br>a1  | 1.11E<br>-07 | 2.60 |
| 116 |  |  |  |  |  |  | Cdk<br>4   | 0.009<br>2419<br>1 | 1.67 |  |  |  | Cd9         | 1.48E<br>-07 | 3.48 |
| 117 |  |  |  |  |  |  | Tme<br>d3  | 0.009<br>7469<br>1 | 3.98 |  |  |  | Ehbp<br>111 | 1.52E<br>-07 | 2.19 |
| 118 |  |  |  |  |  |  | Lam<br>p2  | 0.010<br>1943<br>6 | 1.75 |  |  |  | Gda         | 1.66E<br>-07 | 2.11 |
| 119 |  |  |  |  |  |  | Hnrn<br>pf | 0.010<br>7336      | 2.93 |  |  |  | Glud<br>1   | 1.68E<br>-07 | 3.16 |
| 120 |  |  |  |  |  |  | Ralb<br>p1 | 0.011<br>1088      | 2.67 |  |  |  | Stard<br>7  | 1.73E<br>-07 | 2.72 |
| 121 |  |  |  |  |  |  | Tnpo<br>1  | 0.011<br>4240<br>5 | 1.52 |  |  |  | Zyx         | 1.75E<br>-07 | 1.87 |

|     |  |  |  |  |  |  |              |                    |      |  |  |  |             |              |      |
|-----|--|--|--|--|--|--|--------------|--------------------|------|--|--|--|-------------|--------------|------|
| 122 |  |  |  |  |  |  | Hsd1<br>7b11 | 0.011<br>5899<br>4 | 1.80 |  |  |  | Ucp2        | 1.82E<br>-07 | 2.15 |
| 123 |  |  |  |  |  |  | Snx5         | 0.012<br>0649<br>9 | 1.64 |  |  |  | Efhd<br>2   | 2.21E<br>-07 | 5.63 |
| 124 |  |  |  |  |  |  | Cenp<br>b    | 0.013<br>8730<br>2 | 1.97 |  |  |  | Klf1<br>3   | 2.74E<br>-07 | 2.11 |
| 125 |  |  |  |  |  |  | 2-<br>Mar    | 0.015<br>8815      | 1.76 |  |  |  | Arhg<br>dia | 3.13E<br>-07 | 1.53 |
| 126 |  |  |  |  |  |  | Pdcd<br>6ip  | 0.016<br>3964<br>8 | 1.79 |  |  |  | Cltc        | 4.40E<br>-07 | 1.58 |
| 127 |  |  |  |  |  |  | Srsf6        | 0.017<br>7723      | 1.64 |  |  |  | Cotl1       | 4.97E<br>-07 | 2.37 |
| 128 |  |  |  |  |  |  | Atp2<br>a2   | 0.020<br>5867<br>3 | 1.51 |  |  |  | Trpv<br>2   | 5.33E<br>-07 | 1.69 |
| 129 |  |  |  |  |  |  | Ppic         | 0.020<br>8768<br>3 | 1.52 |  |  |  | Tln1        | 5.69E<br>-07 | 1.88 |
| 130 |  |  |  |  |  |  | Sri          | 0.027<br>7500<br>8 | 1.72 |  |  |  | Col3<br>a1  | 5.94E<br>-07 | 1.79 |
| 131 |  |  |  |  |  |  | Myc<br>bp2   | 0.028<br>4888<br>9 | 1.51 |  |  |  | Rhog        | 9.88E<br>-07 | 1.70 |
| 132 |  |  |  |  |  |  | Myh<br>1     | 0.029<br>9783<br>3 | 2.07 |  |  |  | Plpp<br>3   | 1.07E<br>-06 | 3.31 |

|     |  |  |  |  |  |  |           |                    |      |  |  |  |              |              |      |
|-----|--|--|--|--|--|--|-----------|--------------------|------|--|--|--|--------------|--------------|------|
| 133 |  |  |  |  |  |  | Dad<br>1  | 0.033<br>1225<br>9 | 2.18 |  |  |  | Akna         | 1.16E<br>-06 | 1.60 |
| 134 |  |  |  |  |  |  | Ube<br>4b | 0.034<br>5654<br>2 | 2.16 |  |  |  | Atp6<br>v0c  | 1.26E<br>-06 | 1.80 |
| 135 |  |  |  |  |  |  | Lrp1<br>0 | 0.037<br>5693<br>9 | 2.16 |  |  |  | Anxa<br>5    | 1.31E<br>-06 | 4.91 |
| 136 |  |  |  |  |  |  | Cdc4<br>5 | 0.039<br>9548<br>8 | 1.55 |  |  |  | Gdi2         | 1.64E<br>-06 | 1.91 |
| 137 |  |  |  |  |  |  | 5-<br>Sep | 0.041<br>0620<br>7 | 1.78 |  |  |  | H2-<br>T23   | 1.81E<br>-06 | 1.70 |
| 138 |  |  |  |  |  |  | Ttn       | 0.042<br>6924<br>9 | 2.15 |  |  |  | Atox<br>1    | 1.95E<br>-06 | 3.87 |
| 139 |  |  |  |  |  |  | Glud<br>1 | 0.048<br>5462<br>1 | 2.44 |  |  |  | Marc<br>ksl1 | 2.22E<br>-06 | 3.01 |
| 140 |  |  |  |  |  |  | Egln<br>2 | 0.056<br>2760<br>1 | 1.86 |  |  |  | Slfn2        | 2.32E<br>-06 | 1.75 |
| 141 |  |  |  |  |  |  | Idh2      | 0.056<br>4826<br>4 | 1.87 |  |  |  | Mif          | 2.97E<br>-06 | 2.29 |
| 142 |  |  |  |  |  |  | Pxk       | 0.059<br>5675<br>2 | 1.92 |  |  |  | Cast         | 3.41E<br>-06 | 2.13 |
| 143 |  |  |  |  |  |  | Kif1<br>c | 0.065<br>9196<br>8 | 2.85 |  |  |  | Dcn          | 4.50E<br>-06 | 5.65 |

|     |  |  |  |  |  |  |                 |                    |      |  |  |  |             |              |      |
|-----|--|--|--|--|--|--|-----------------|--------------------|------|--|--|--|-------------|--------------|------|
| 144 |  |  |  |  |  |  | Psm<br>c3       | 0.065<br>9317<br>7 | 2.54 |  |  |  | Atp6<br>v0e | 4.73E<br>-06 | 2.39 |
| 145 |  |  |  |  |  |  | Eif4<br>a1      | 0.066<br>1567      | 1.76 |  |  |  | Fn1         | 4.87E<br>-06 | 1.75 |
| 146 |  |  |  |  |  |  | Ssr3            | 0.073<br>245       | 2.06 |  |  |  | Diap<br>h1  | 5.63E<br>-06 | 1.56 |
| 147 |  |  |  |  |  |  | Pole<br>4       | 0.077<br>9970<br>1 | 2.04 |  |  |  | Anxa<br>7   | 5.76E<br>-06 | 2.19 |
| 148 |  |  |  |  |  |  | Tme<br>m12<br>7 | 0.084<br>5829<br>6 | 1.55 |  |  |  | Sptlc<br>2  | 5.88E<br>-06 | 1.96 |
| 149 |  |  |  |  |  |  | Myl<br>1        | 0.096<br>2775<br>2 | 2.29 |  |  |  | Lrp1<br>0   | 6.05E<br>-06 | 2.05 |
| 150 |  |  |  |  |  |  | Ubr4            | 0.103<br>6370<br>2 | 1.58 |  |  |  | Unc9<br>3b1 | 7.17E<br>-06 | 2.03 |
| 151 |  |  |  |  |  |  | Papo<br>la      | 0.106<br>1842<br>9 | 1.98 |  |  |  | Lpga<br>t1  | 8.47E<br>-06 | 2.15 |
| 152 |  |  |  |  |  |  | Gna<br>12       | 0.106<br>2377<br>1 | 1.53 |  |  |  | Sh3g<br>lb1 | 8.48E<br>-06 | 2.19 |
| 153 |  |  |  |  |  |  | Pyg<br>m        | 0.107<br>0387<br>3 | 2.86 |  |  |  | Vps2<br>6a  | 1.00E<br>-05 | 2.05 |
| 154 |  |  |  |  |  |  | Ilrun           | 0.112<br>6186<br>8 | 3.88 |  |  |  | Lgals<br>1  | 1.02E<br>-05 | 2.78 |

|     |  |  |  |  |  |  |             |                    |      |  |  |  |              |              |      |
|-----|--|--|--|--|--|--|-------------|--------------------|------|--|--|--|--------------|--------------|------|
| 155 |  |  |  |  |  |  | Aldo<br>a   | 0.114<br>4574<br>6 | 2.33 |  |  |  | Itga<br>m    | 1.02E<br>-05 | 1.71 |
| 156 |  |  |  |  |  |  | Mpri<br>p   | 0.123<br>8798<br>5 | 2.17 |  |  |  | S100<br>a11  | 1.07E<br>-05 | 1.70 |
| 157 |  |  |  |  |  |  | Arpc<br>1b  | 0.130<br>9506<br>4 | 1.62 |  |  |  | Wdr<br>1     | 1.20E<br>-05 | 2.20 |
| 158 |  |  |  |  |  |  | Mkn<br>k2   | 0.169<br>3241<br>9 | 1.81 |  |  |  | Nplo<br>c4   | 1.35E<br>-05 | 2.44 |
| 159 |  |  |  |  |  |  | Pgp         | 0.198<br>2358<br>3 | 4.25 |  |  |  | Sh3b<br>grl3 | 1.40E<br>-05 | 2.33 |
| 160 |  |  |  |  |  |  | Myb<br>pc2  | 0.202<br>0470<br>2 | 3.50 |  |  |  | B4ga<br>lt1  | 1.42E<br>-05 | 3.47 |
| 161 |  |  |  |  |  |  | Actn<br>3   | 0.208<br>3458<br>1 | 5.34 |  |  |  | Actn<br>1    | 1.65E<br>-05 | 1.66 |
| 162 |  |  |  |  |  |  | Lapt<br>m5  | 0.219<br>8687<br>6 | 1.87 |  |  |  | Ankf<br>y1   | 1.95E<br>-05 | 1.98 |
| 163 |  |  |  |  |  |  | Get4        | 0.235<br>1512<br>1 | 1.56 |  |  |  | Myh<br>9     | 1.97E<br>-05 | 1.58 |
| 164 |  |  |  |  |  |  | Hnrn<br>ph2 | 0.244<br>1547<br>9 | 1.70 |  |  |  | Selen<br>ot  | 2.13E<br>-05 | 2.04 |
| 165 |  |  |  |  |  |  | Igsf6       | 0.273<br>1173<br>7 | 6.28 |  |  |  | Capn<br>2    | 2.16E<br>-05 | 1.97 |

|     |  |  |  |  |  |  |             |                    |      |  |  |  |                 |              |      |
|-----|--|--|--|--|--|--|-------------|--------------------|------|--|--|--|-----------------|--------------|------|
| 166 |  |  |  |  |  |  | Atp6<br>ap1 | 0.295<br>5041<br>6 | 2.16 |  |  |  | Pga<br>m1       | 2.31E<br>-05 | 1.74 |
| 167 |  |  |  |  |  |  | Ranb<br>p9  | 0.300<br>5792<br>4 | 1.58 |  |  |  | Gnb2            | 2.38E<br>-05 | 1.87 |
| 168 |  |  |  |  |  |  | Tbrg<br>1   | 0.324<br>8875<br>2 | 1.71 |  |  |  | Usp2<br>5       | 2.43E<br>-05 | 1.71 |
| 169 |  |  |  |  |  |  | Psm<br>d2   | 0.346<br>5605<br>5 | 1.56 |  |  |  | Spi1            | 2.60E<br>-05 | 2.36 |
| 170 |  |  |  |  |  |  | Atp5<br>o   | 0.349<br>2058<br>7 | 2.32 |  |  |  | Pim1            | 2.73E<br>-05 | 2.19 |
| 171 |  |  |  |  |  |  | Parp<br>1   | 0.405<br>5069<br>3 | 1.69 |  |  |  | Znrf<br>1       | 2.79E<br>-05 | 1.96 |
| 172 |  |  |  |  |  |  | Pspc<br>1   | 0.461<br>8410<br>9 | 3.03 |  |  |  | Tme<br>m25<br>9 | 3.28E<br>-05 | 1.87 |
| 173 |  |  |  |  |  |  | Nduf<br>v2  | 0.510<br>3910<br>3 | 1.85 |  |  |  | Csrp<br>1       | 3.84E<br>-05 | 3.33 |
| 174 |  |  |  |  |  |  | Hsbp<br>1   | 0.526<br>8459      | 2.61 |  |  |  | Riok<br>3       | 3.87E<br>-05 | 1.52 |
| 175 |  |  |  |  |  |  | Uqcr<br>h   | 0.561<br>2111<br>5 | 1.76 |  |  |  | Emp<br>3        | 4.90E<br>-05 | 2.60 |
| 176 |  |  |  |  |  |  | Myl<br>pf   | 0.570<br>5799<br>4 | 2.44 |  |  |  | Pitpn<br>a      | 5.29E<br>-05 | 1.85 |



|     |  |  |  |  |  |  |             |                    |      |  |  |  |             |              |       |
|-----|--|--|--|--|--|--|-------------|--------------------|------|--|--|--|-------------|--------------|-------|
| 177 |  |  |  |  |  |  | Ino8<br>0e  | 0.716<br>2037      | 1.83 |  |  |  | Hmo<br>x1   | 5.86E<br>-05 | 10.18 |
| 178 |  |  |  |  |  |  | Arcn<br>1   | 0.777<br>4405<br>7 | 1.69 |  |  |  | Vdac<br>2   | 5.90E<br>-05 | 2.54  |
| 179 |  |  |  |  |  |  | Pdha<br>1   | 0.927<br>0345<br>4 | 1.63 |  |  |  | Plva<br>p   | 6.33E<br>-05 | 3.85  |
| 180 |  |  |  |  |  |  | St3g<br>al1 | 0.960<br>4094<br>6 | 1.53 |  |  |  | Rab1<br>la  | 6.45E<br>-05 | 1.89  |
| 181 |  |  |  |  |  |  |             |                    |      |  |  |  | Rtf2        | 6.55E<br>-05 | 1.87  |
| 182 |  |  |  |  |  |  |             |                    |      |  |  |  | Fkbp<br>la  | 8.16E<br>-05 | 2.33  |
| 183 |  |  |  |  |  |  |             |                    |      |  |  |  | Fli1        | 8.73E<br>-05 | 2.48  |
| 184 |  |  |  |  |  |  |             |                    |      |  |  |  | Acsl<br>5   | 8.78E<br>-05 | 2.14  |
| 185 |  |  |  |  |  |  |             |                    |      |  |  |  | Flot2       | 9.04E<br>-05 | 2.77  |
| 186 |  |  |  |  |  |  |             |                    |      |  |  |  | Polr2<br>j  | 1.24E<br>-04 | 2.40  |
| 187 |  |  |  |  |  |  |             |                    |      |  |  |  | Spec<br>c1  | 1.24E<br>-04 | 1.79  |
| 188 |  |  |  |  |  |  |             |                    |      |  |  |  | Nsd2        | 1.48E<br>-04 | 1.60  |
| 189 |  |  |  |  |  |  |             |                    |      |  |  |  | Pdcd<br>6ip | 1.67E<br>-04 | 1.81  |
| 190 |  |  |  |  |  |  |             |                    |      |  |  |  | Ppt1        | 1.83E<br>-04 | 2.33  |
| 191 |  |  |  |  |  |  |             |                    |      |  |  |  | Actr<br>3   | 1.87E<br>-04 | 2.54  |

|     |  |  |  |  |  |  |  |  |  |  |  |  |             |              |      |
|-----|--|--|--|--|--|--|--|--|--|--|--|--|-------------|--------------|------|
| 192 |  |  |  |  |  |  |  |  |  |  |  |  | Adgr<br>e5  | 1.87E<br>-04 | 1.58 |
| 193 |  |  |  |  |  |  |  |  |  |  |  |  | Ywh<br>ag   | 1.89E<br>-04 | 2.48 |
| 194 |  |  |  |  |  |  |  |  |  |  |  |  | Bag1        | 1.90E<br>-04 | 1.77 |
| 195 |  |  |  |  |  |  |  |  |  |  |  |  | Grb2        | 1.99E<br>-04 | 1.94 |
| 196 |  |  |  |  |  |  |  |  |  |  |  |  | Zc3h<br>av1 | 2.10E<br>-04 | 1.91 |
| 197 |  |  |  |  |  |  |  |  |  |  |  |  | Rab5<br>c   | 2.30E<br>-04 | 1.55 |
| 198 |  |  |  |  |  |  |  |  |  |  |  |  | Dbi         | 2.33E<br>-04 | 1.54 |
| 199 |  |  |  |  |  |  |  |  |  |  |  |  | Eng         | 2.38E<br>-04 | 4.64 |
| 200 |  |  |  |  |  |  |  |  |  |  |  |  | Plxn<br>d1  | 2.55E<br>-04 | 1.92 |
| 201 |  |  |  |  |  |  |  |  |  |  |  |  | Ddx5        | 2.65E<br>-04 | 1.65 |
| 202 |  |  |  |  |  |  |  |  |  |  |  |  | Tbc1<br>d2b | 2.65E<br>-04 | 3.63 |
| 203 |  |  |  |  |  |  |  |  |  |  |  |  | Canx        | 2.79E<br>-04 | 1.89 |
| 204 |  |  |  |  |  |  |  |  |  |  |  |  | Nap1<br>l4  | 3.01E<br>-04 | 2.22 |
| 205 |  |  |  |  |  |  |  |  |  |  |  |  | Arel<br>1   | 3.05E<br>-04 | 2.59 |
| 206 |  |  |  |  |  |  |  |  |  |  |  |  | Vasp        | 3.12E<br>-04 | 1.69 |
| 207 |  |  |  |  |  |  |  |  |  |  |  |  | Iqga<br>p1  | 3.25E<br>-04 | 1.57 |

|     |  |  |  |  |  |  |  |  |  |  |  |  |              |              |      |
|-----|--|--|--|--|--|--|--|--|--|--|--|--|--------------|--------------|------|
| 208 |  |  |  |  |  |  |  |  |  |  |  |  | H2-<br>Eb1   | 3.28E<br>-04 | 2.04 |
| 209 |  |  |  |  |  |  |  |  |  |  |  |  | Ostf1        | 3.52E<br>-04 | 1.86 |
| 210 |  |  |  |  |  |  |  |  |  |  |  |  | Akr1<br>a1   | 3.65E<br>-04 | 2.06 |
| 211 |  |  |  |  |  |  |  |  |  |  |  |  | Ebna<br>1bp2 | 3.67E<br>-04 | 2.59 |
| 212 |  |  |  |  |  |  |  |  |  |  |  |  | Atp6<br>v0b  | 4.08E<br>-04 | 1.75 |
| 213 |  |  |  |  |  |  |  |  |  |  |  |  | Psemb<br>3   | 4.37E<br>-04 | 2.01 |
| 214 |  |  |  |  |  |  |  |  |  |  |  |  | Mif4<br>gd   | 4.59E<br>-04 | 4.98 |
| 215 |  |  |  |  |  |  |  |  |  |  |  |  | Cebp<br>d    | 4.67E<br>-04 | 3.07 |
| 216 |  |  |  |  |  |  |  |  |  |  |  |  | Srrt         | 4.68E<br>-04 | 1.58 |
| 217 |  |  |  |  |  |  |  |  |  |  |  |  | Spsb<br>3    | 4.71E<br>-04 | 1.60 |
| 218 |  |  |  |  |  |  |  |  |  |  |  |  | Cct2         | 4.72E<br>-04 | 1.61 |
| 219 |  |  |  |  |  |  |  |  |  |  |  |  | Pcmt<br>1    | 4.86E<br>-04 | 1.62 |
| 220 |  |  |  |  |  |  |  |  |  |  |  |  | Gls          | 5.00E<br>-04 | 1.62 |
| 221 |  |  |  |  |  |  |  |  |  |  |  |  | Lmbr<br>d1   | 5.37E<br>-04 | 2.17 |
| 222 |  |  |  |  |  |  |  |  |  |  |  |  | Csnk<br>1a1  | 5.89E<br>-04 | 1.76 |
| 223 |  |  |  |  |  |  |  |  |  |  |  |  | Ssna<br>1    | 6.31E<br>-04 | 4.09 |

|     |  |  |  |  |  |  |  |  |  |  |  |  |               |                    |      |
|-----|--|--|--|--|--|--|--|--|--|--|--|--|---------------|--------------------|------|
| 224 |  |  |  |  |  |  |  |  |  |  |  |  | Syng<br>r2    | 6.33E<br>-04       | 6.74 |
| 225 |  |  |  |  |  |  |  |  |  |  |  |  | Mtpn          | 6.34E<br>-04       | 2.99 |
| 226 |  |  |  |  |  |  |  |  |  |  |  |  | Ank           | 6.60E<br>-04       | 6.40 |
| 227 |  |  |  |  |  |  |  |  |  |  |  |  | Lrrfi<br>p1   | 7.03E<br>-04       | 1.53 |
| 228 |  |  |  |  |  |  |  |  |  |  |  |  | Hsp9<br>0b1   | 8.11E<br>-04       | 1.80 |
| 229 |  |  |  |  |  |  |  |  |  |  |  |  | Hist1<br>h2bc | 9.21E<br>-04       | 2.72 |
| 230 |  |  |  |  |  |  |  |  |  |  |  |  | Sirpa         | 0.001<br>0149<br>4 | 1.53 |
| 231 |  |  |  |  |  |  |  |  |  |  |  |  | Hsd1<br>7b11  | 0.001<br>0659<br>7 | 1.80 |
| 232 |  |  |  |  |  |  |  |  |  |  |  |  | Bptf          | 0.001<br>1148      | 1.79 |
| 233 |  |  |  |  |  |  |  |  |  |  |  |  | Nfe2<br>l2    | 0.001<br>2433<br>7 | 1.50 |
| 234 |  |  |  |  |  |  |  |  |  |  |  |  | Rhoa          | 0.001<br>4149<br>4 | 4.07 |
| 235 |  |  |  |  |  |  |  |  |  |  |  |  | Vsir          | 0.001<br>4437<br>7 | 2.51 |
| 236 |  |  |  |  |  |  |  |  |  |  |  |  | Psmc<br>4     | 0.001<br>5236<br>9 | 2.11 |

|     |  |  |  |  |  |  |  |  |  |  |  |  |             |                    |      |
|-----|--|--|--|--|--|--|--|--|--|--|--|--|-------------|--------------------|------|
| 237 |  |  |  |  |  |  |  |  |  |  |  |  | Ranb<br>p9  | 0.001<br>5286      | 1.62 |
| 238 |  |  |  |  |  |  |  |  |  |  |  |  | Capn<br>1   | 0.001<br>7260<br>1 | 1.77 |
| 239 |  |  |  |  |  |  |  |  |  |  |  |  | Ago2        | 0.001<br>8437<br>7 | 1.76 |
| 240 |  |  |  |  |  |  |  |  |  |  |  |  | Uqcr<br>11  | 0.002<br>0248<br>9 | 1.93 |
| 241 |  |  |  |  |  |  |  |  |  |  |  |  | Irf2b<br>p2 | 0.002<br>0902<br>5 | 1.84 |
| 242 |  |  |  |  |  |  |  |  |  |  |  |  | Spop        | 0.002<br>3320<br>4 | 1.86 |
| 243 |  |  |  |  |  |  |  |  |  |  |  |  | Psmb<br>2   | 0.002<br>4176<br>6 | 2.73 |
| 244 |  |  |  |  |  |  |  |  |  |  |  |  | Arf6        | 0.002<br>5788<br>3 | 1.58 |
| 245 |  |  |  |  |  |  |  |  |  |  |  |  | Sdf2        | 0.002<br>6326<br>7 | 1.70 |
| 246 |  |  |  |  |  |  |  |  |  |  |  |  | Map<br>k3   | 0.002<br>6520<br>5 | 1.71 |
| 247 |  |  |  |  |  |  |  |  |  |  |  |  | Fbx<br>w11  | 0.002<br>7789      | 1.73 |

|     |  |  |  |  |  |  |  |  |  |  |  |  |            |                    |      |
|-----|--|--|--|--|--|--|--|--|--|--|--|--|------------|--------------------|------|
| 248 |  |  |  |  |  |  |  |  |  |  |  |  | Ncf4       | 0.003<br>0582<br>8 | 1.70 |
| 249 |  |  |  |  |  |  |  |  |  |  |  |  | Cnot<br>8  | 0.003<br>1530<br>1 | 1.72 |
| 250 |  |  |  |  |  |  |  |  |  |  |  |  | Psmc<br>6  | 0.003<br>5074<br>2 | 1.68 |
| 251 |  |  |  |  |  |  |  |  |  |  |  |  | Kat6<br>a  | 0.003<br>5146<br>8 | 1.70 |
| 252 |  |  |  |  |  |  |  |  |  |  |  |  | Fkbp<br>8  | 0.004<br>2679<br>4 | 1.54 |
| 253 |  |  |  |  |  |  |  |  |  |  |  |  | Col5<br>a1 | 0.004<br>4391<br>9 | 1.54 |
| 254 |  |  |  |  |  |  |  |  |  |  |  |  | Map<br>3k3 | 0.004<br>552       | 5.97 |
| 255 |  |  |  |  |  |  |  |  |  |  |  |  | Sdha       | 0.004<br>5670<br>8 | 1.86 |
| 256 |  |  |  |  |  |  |  |  |  |  |  |  | Arpc<br>4  | 0.004<br>7043<br>5 | 2.52 |
| 257 |  |  |  |  |  |  |  |  |  |  |  |  | Sars       | 0.005<br>1631<br>1 | 1.72 |
| 258 |  |  |  |  |  |  |  |  |  |  |  |  | Ptpn<br>1  | 0.005<br>4417<br>5 | 1.87 |

|     |  |  |  |  |  |  |  |  |  |  |  |  |               |                    |       |
|-----|--|--|--|--|--|--|--|--|--|--|--|--|---------------|--------------------|-------|
| 259 |  |  |  |  |  |  |  |  |  |  |  |  | Hspg<br>2     | 0.005<br>6539<br>9 | 1.73  |
| 260 |  |  |  |  |  |  |  |  |  |  |  |  | Mia2          | 0.005<br>8235<br>6 | 2.47  |
| 261 |  |  |  |  |  |  |  |  |  |  |  |  | Cct6<br>a     | 0.005<br>9916<br>3 | 11.69 |
| 262 |  |  |  |  |  |  |  |  |  |  |  |  | Capn<br>s1    | 0.006<br>0063<br>8 | 2.03  |
| 263 |  |  |  |  |  |  |  |  |  |  |  |  | Get4          | 0.006<br>3953<br>8 | 1.93  |
| 264 |  |  |  |  |  |  |  |  |  |  |  |  | Tcf2<br>5     | 0.007<br>2946<br>4 | 1.82  |
| 265 |  |  |  |  |  |  |  |  |  |  |  |  | Htra<br>2     | 0.007<br>3045<br>6 | 2.19  |
| 266 |  |  |  |  |  |  |  |  |  |  |  |  | Lyp1<br>a2    | 0.007<br>8206<br>6 | 2.12  |
| 267 |  |  |  |  |  |  |  |  |  |  |  |  | Atp2<br>a2    | 0.007<br>9325<br>3 | 1.81  |
| 268 |  |  |  |  |  |  |  |  |  |  |  |  | Ptbp<br>1     | 0.008<br>1341<br>7 | 1.77  |
| 269 |  |  |  |  |  |  |  |  |  |  |  |  | Gaba<br>rap12 | 0.009<br>0322      | 1.60  |

|     |  |  |  |  |  |  |  |  |  |  |  |  |                 |                    |      |
|-----|--|--|--|--|--|--|--|--|--|--|--|--|-----------------|--------------------|------|
| 270 |  |  |  |  |  |  |  |  |  |  |  |  | Hbp1            | 0.009<br>7106<br>1 | 1.71 |
| 271 |  |  |  |  |  |  |  |  |  |  |  |  | Med<br>13l      | 0.009<br>9487<br>6 | 1.79 |
| 272 |  |  |  |  |  |  |  |  |  |  |  |  | Ogdh            | 0.011<br>5970<br>2 | 3.08 |
| 273 |  |  |  |  |  |  |  |  |  |  |  |  | Ppp6<br>rl      | 0.012<br>5518<br>4 | 2.24 |
| 274 |  |  |  |  |  |  |  |  |  |  |  |  | Pgk1            | 0.012<br>7102<br>6 | 3.94 |
| 275 |  |  |  |  |  |  |  |  |  |  |  |  | Eif2s<br>2      | 0.013<br>6305<br>8 | 1.70 |
| 276 |  |  |  |  |  |  |  |  |  |  |  |  | Cyb5<br>a       | 0.013<br>7490<br>7 | 1.53 |
| 277 |  |  |  |  |  |  |  |  |  |  |  |  | Tram<br>1       | 0.014<br>3008<br>3 | 1.77 |
| 278 |  |  |  |  |  |  |  |  |  |  |  |  | Tcirg<br>1      | 0.016<br>0317<br>1 | 2.09 |
| 279 |  |  |  |  |  |  |  |  |  |  |  |  | Tsc2<br>2d3     | 0.017<br>2299<br>9 | 1.97 |
| 280 |  |  |  |  |  |  |  |  |  |  |  |  | Tme<br>ml3<br>4 | 0.017<br>5021<br>8 | 1.52 |



|     |  |  |  |  |  |  |  |  |  |  |  |  |             |                    |      |
|-----|--|--|--|--|--|--|--|--|--|--|--|--|-------------|--------------------|------|
| 281 |  |  |  |  |  |  |  |  |  |  |  |  | Mbd<br>3    | 0.017<br>7708<br>4 | 1.52 |
| 282 |  |  |  |  |  |  |  |  |  |  |  |  | Flna        | 0.017<br>9425<br>6 | 1.67 |
| 283 |  |  |  |  |  |  |  |  |  |  |  |  | Bcl2l<br>1  | 0.018<br>1136<br>4 | 1.57 |
| 284 |  |  |  |  |  |  |  |  |  |  |  |  | Psma<br>2   | 0.019<br>1540<br>8 | 3.41 |
| 285 |  |  |  |  |  |  |  |  |  |  |  |  | Zmat<br>2   | 0.019<br>5073<br>7 | 3.47 |
| 286 |  |  |  |  |  |  |  |  |  |  |  |  | Traf7       | 0.022<br>3382<br>5 | 1.71 |
| 287 |  |  |  |  |  |  |  |  |  |  |  |  | Dnaj<br>b1  | 0.029<br>9636<br>2 | 1.50 |
| 288 |  |  |  |  |  |  |  |  |  |  |  |  | Stx1<br>6   | 0.033<br>1499<br>7 | 1.51 |
| 289 |  |  |  |  |  |  |  |  |  |  |  |  | Cops<br>7a  | 0.034<br>6510<br>3 | 2.08 |
| 290 |  |  |  |  |  |  |  |  |  |  |  |  | Sync<br>rip | 0.035<br>7136<br>1 | 1.64 |
| 291 |  |  |  |  |  |  |  |  |  |  |  |  | Tsc2<br>2d1 | 0.035<br>9126<br>5 | 5.90 |

|     |  |  |  |  |  |  |  |  |  |  |  |  |               |                    |      |
|-----|--|--|--|--|--|--|--|--|--|--|--|--|---------------|--------------------|------|
| 292 |  |  |  |  |  |  |  |  |  |  |  |  | Tm9<br>sf2    | 0.037<br>1328<br>7 | 2.40 |
| 293 |  |  |  |  |  |  |  |  |  |  |  |  | Nme<br>1      | 0.038<br>3304<br>2 | 1.95 |
| 294 |  |  |  |  |  |  |  |  |  |  |  |  | Map<br>7d1    | 0.038<br>5154<br>5 | 1.52 |
| 295 |  |  |  |  |  |  |  |  |  |  |  |  | U2af<br>1     | 0.039<br>4074<br>5 | 1.75 |
| 296 |  |  |  |  |  |  |  |  |  |  |  |  | Eif4g<br>2    | 0.040<br>2235<br>5 | 1.52 |
| 297 |  |  |  |  |  |  |  |  |  |  |  |  | Nduf<br>b1-ps | 0.042<br>1714<br>5 | 1.53 |
| 298 |  |  |  |  |  |  |  |  |  |  |  |  | Psen<br>en    | 0.045<br>7264<br>7 | 2.35 |
| 299 |  |  |  |  |  |  |  |  |  |  |  |  | Ppp2<br>ca    | 0.053<br>9394<br>5 | 3.73 |
| 300 |  |  |  |  |  |  |  |  |  |  |  |  | Suds<br>3     | 0.055<br>2422<br>4 | 1.87 |
| 301 |  |  |  |  |  |  |  |  |  |  |  |  | Lyst          | 0.056<br>8017<br>4 | 1.51 |
| 302 |  |  |  |  |  |  |  |  |  |  |  |  | Cdkn<br>2c    | 0.058<br>3771<br>5 | 1.60 |

|     |  |  |  |  |  |  |  |  |  |  |  |  |             |                    |      |
|-----|--|--|--|--|--|--|--|--|--|--|--|--|-------------|--------------------|------|
| 303 |  |  |  |  |  |  |  |  |  |  |  |  | Ap2a<br>2   | 0.058<br>4554<br>6 | 1.51 |
| 304 |  |  |  |  |  |  |  |  |  |  |  |  | Pkn1        | 0.058<br>9965<br>6 | 1.63 |
| 305 |  |  |  |  |  |  |  |  |  |  |  |  | Mob<br>1a   | 0.059<br>9763<br>7 | 4.82 |
| 306 |  |  |  |  |  |  |  |  |  |  |  |  | Snrp<br>e   | 0.064<br>5961<br>5 | 2.32 |
| 307 |  |  |  |  |  |  |  |  |  |  |  |  | Hexa        | 0.065<br>4926<br>8 | 1.74 |
| 308 |  |  |  |  |  |  |  |  |  |  |  |  | Ppp2<br>r5c | 0.066<br>7834<br>4 | 1.85 |
| 309 |  |  |  |  |  |  |  |  |  |  |  |  | App         | 0.071<br>6705<br>2 | 1.82 |
| 310 |  |  |  |  |  |  |  |  |  |  |  |  | Ptpn<br>11  | 0.075<br>8450<br>8 | 1.63 |
| 311 |  |  |  |  |  |  |  |  |  |  |  |  | Sh3b<br>grl | 0.078<br>6915      | 1.62 |
| 312 |  |  |  |  |  |  |  |  |  |  |  |  | Wnk<br>1    | 0.079<br>3694<br>6 | 1.76 |
| 313 |  |  |  |  |  |  |  |  |  |  |  |  | Ptpn<br>12  | 0.080<br>4127<br>1 | 1.99 |

|     |  |  |  |  |  |  |  |  |  |  |  |  |              |                    |      |
|-----|--|--|--|--|--|--|--|--|--|--|--|--|--------------|--------------------|------|
| 314 |  |  |  |  |  |  |  |  |  |  |  |  | Szrd<br>1    | 0.087<br>4136<br>5 | 1.61 |
| 315 |  |  |  |  |  |  |  |  |  |  |  |  | Pafa<br>h1b1 | 0.088<br>7772<br>2 | 1.55 |
| 316 |  |  |  |  |  |  |  |  |  |  |  |  | Actr<br>10   | 0.091<br>4118<br>7 | 2.25 |
| 317 |  |  |  |  |  |  |  |  |  |  |  |  | Dctn<br>2    | 0.094<br>1726<br>8 | 1.59 |
| 318 |  |  |  |  |  |  |  |  |  |  |  |  | Tubb<br>4b   | 0.121<br>2657<br>3 | 1.65 |
| 319 |  |  |  |  |  |  |  |  |  |  |  |  | Ptms         | 0.122<br>7660<br>5 | 1.67 |
| 320 |  |  |  |  |  |  |  |  |  |  |  |  | Psmb<br>7    | 0.126<br>7646<br>6 | 1.65 |
| 321 |  |  |  |  |  |  |  |  |  |  |  |  | Tra2<br>a    | 0.131<br>2282<br>2 | 2.32 |
| 322 |  |  |  |  |  |  |  |  |  |  |  |  | Fam<br>168b  | 0.141<br>4183<br>7 | 1.79 |
| 323 |  |  |  |  |  |  |  |  |  |  |  |  | Cma<br>s     | 0.145<br>5690<br>8 | 1.86 |
| 324 |  |  |  |  |  |  |  |  |  |  |  |  | Ube2<br>b    | 0.183<br>0631<br>9 | 1.62 |

|     |  |  |  |  |  |  |  |  |  |  |  |  |            |                    |      |
|-----|--|--|--|--|--|--|--|--|--|--|--|--|------------|--------------------|------|
| 325 |  |  |  |  |  |  |  |  |  |  |  |  | Pds5<br>a  | 0.189<br>0358<br>9 | 1.69 |
| 326 |  |  |  |  |  |  |  |  |  |  |  |  | Nars       | 0.210<br>1245<br>2 | 1.64 |
| 327 |  |  |  |  |  |  |  |  |  |  |  |  | Vars       | 0.214<br>0980<br>2 | 1.65 |
| 328 |  |  |  |  |  |  |  |  |  |  |  |  | Mtor       | 0.222<br>9994<br>3 | 1.67 |
| 329 |  |  |  |  |  |  |  |  |  |  |  |  | Surf4      | 0.228<br>0435<br>4 | 2.12 |
| 330 |  |  |  |  |  |  |  |  |  |  |  |  | Orai<br>1  | 0.232<br>5344<br>3 | 1.58 |
| 331 |  |  |  |  |  |  |  |  |  |  |  |  | Atp1<br>a1 | 0.248<br>1251<br>6 | 1.77 |
| 332 |  |  |  |  |  |  |  |  |  |  |  |  | Vps3<br>5  | 0.251<br>7792<br>6 | 1.65 |
| 333 |  |  |  |  |  |  |  |  |  |  |  |  | Cpsf<br>6  | 0.252<br>4707<br>6 | 2.05 |
| 334 |  |  |  |  |  |  |  |  |  |  |  |  | Sri        | 0.279<br>8421      | 1.59 |
| 335 |  |  |  |  |  |  |  |  |  |  |  |  | Itm2<br>c  | 0.286<br>3371<br>1 | 1.77 |

|     |  |  |  |  |  |  |  |  |  |  |  |  |                   |                    |      |
|-----|--|--|--|--|--|--|--|--|--|--|--|--|-------------------|--------------------|------|
| 336 |  |  |  |  |  |  |  |  |  |  |  |  | Stt3b             | 0.332<br>4330<br>4 | 1.53 |
| 337 |  |  |  |  |  |  |  |  |  |  |  |  | Ppp1<br>r8        | 0.387<br>3692<br>6 | 1.67 |
| 338 |  |  |  |  |  |  |  |  |  |  |  |  | Atp5<br>c1        | 0.388<br>8033<br>4 | 2.03 |
| 339 |  |  |  |  |  |  |  |  |  |  |  |  | Supt<br>5         | 0.416<br>0473<br>7 | 1.69 |
| 340 |  |  |  |  |  |  |  |  |  |  |  |  | Eif3l             | 0.447<br>8203      | 1.82 |
| 341 |  |  |  |  |  |  |  |  |  |  |  |  | Nduf<br>b8        | 0.491<br>5338<br>7 | 2.40 |
| 342 |  |  |  |  |  |  |  |  |  |  |  |  | Kidi<br>ns22<br>0 | 0.495<br>6792<br>8 | 2.02 |
| 343 |  |  |  |  |  |  |  |  |  |  |  |  | Asap<br>1         | 0.708<br>1681<br>8 | 1.61 |
| 344 |  |  |  |  |  |  |  |  |  |  |  |  | Mtch<br>1         | 0.771<br>3583<br>6 | 1.63 |
| 345 |  |  |  |  |  |  |  |  |  |  |  |  | Ubal<br>d2        | 0.810<br>2584<br>4 | 1.58 |
| 346 |  |  |  |  |  |  |  |  |  |  |  |  | Uqcr<br>h         | 0.865<br>1378<br>3 | 1.59 |

|     |  |  |  |  |  |  |  |  |  |  |  |  |        |                    |      |
|-----|--|--|--|--|--|--|--|--|--|--|--|--|--------|--------------------|------|
| 347 |  |  |  |  |  |  |  |  |  |  |  |  | Marks  | 0.895<br>3677      | 2.67 |
| 348 |  |  |  |  |  |  |  |  |  |  |  |  | Ssr3   | 0.906<br>9953<br>6 | 1.83 |
| 349 |  |  |  |  |  |  |  |  |  |  |  |  | Ppic   | 0.930<br>6925<br>9 | 1.53 |
| 350 |  |  |  |  |  |  |  |  |  |  |  |  | Ndufa2 | 0.978<br>6105<br>5 | 3.02 |

**Supplementary Table S3.** Unsupervised global gene clustering. Top expressed genes of each cluster sorted by p-value for the two-week MDA-MB-231 sample.

| Top features | Cluster 1 | p-value  | fold change | Cluster 2 | p-value  | fold change | Cluster 3 | p-value    | fold change |
|--------------|-----------|----------|-------------|-----------|----------|-------------|-----------|------------|-------------|
| 1            | Col1a2    | 4.08E-97 | 2.89        | Col3a1    | 1.38E-93 | 5.34        | Col2a1    | 1.26E-177  | 51.98       |
| 2            | Col1a1    | 1.89E-71 | 2.79        | Crip1     | 1.13E-56 | 16.42       | Col9a1    | 1.02E-152  | 39.51       |
| 3            | Bglap     | 1.15E-38 | 11.72       | Col6a2    | 4.58E-56 | 6.15        | Col9a3    | 1.63E-136  | 39.80       |
| 4            | Acp5      | 1.83E-33 | 5.47        | Tnn       | 6.68E-55 | 14.98       | Comp      | 3.28E-97   | 19.55       |
| 5            | Dmp1      | 7.87E-33 | 5.32        | Lmna      | 1.65E-54 | 6.10        | Col9a2    | 4.10E-89   | 16.79       |
| 6            | Ctsk      | 6.96E-32 | 6.78        | Acta1     | 3.53E-49 | 9.94        | Acan      | 6.10E-76   | 20.68       |
| 7            | Col11a2   | 8.61E-30 | 2.85        | Col6a1    | 6.56E-49 | 6.19        | Mgp       | 5.94E-69   | 13.58       |
| 8            | Nrp2      | 3.02E-28 | 2.54        | Vim       | 6.20E-48 | 7.84        | Cst3      | 6.63E-29   | 6.10        |
| 9            | Gja1      | 1.85E-25 | 2.30        | Tgfb1     | 4.16E-47 | 8.86        | Ccdc80    | 1.63E-21   | 3.42        |
| 10           | Id3       | 6.59E-24 | 2.27        | Ecm1      | 7.86E-45 | 12.80       | Smoc2     | 1.74E-17   | 6.77        |
| 11           | Ckb       | 9.08E-22 | 3.69        | Aebp1     | 1.33E-43 | 7.23        | Cspg4     | 2.63E-17   | 2.20        |
| 12           | Col22a1   | 3.15E-20 | 2.41        | Thbs2     | 1.72E-43 | 6.83        | Rbp4      | 1.50E-16   | 4.65        |
| 13           | Mmp9      | 6.25E-16 | 1.89        | Col6a3    | 5.37E-43 | 5.74        | Fn1       | 1.75E-10   | 2.14        |
| 14           | Col11a1   | 1.37E-12 | 1.90        | Col5a1    | 1.62E-42 | 3.15        | Sdc4      | 2.68E-08   | 2.48        |
| 15           | Ptgis     | 3.34E-11 | 1.82        | Postn     | 2.70E-41 | 5.48        | Alpl      | 3.80E-08   | 1.73        |
| 16           | Creb3l1   | 2.04E-10 | 2.47        | Tnnc2     | 4.66E-41 | 7.37        | Col16a1   | 1.21E-07   | 1.87        |
| 17           | Phospho1  | 3.12E-10 | 2.28        | Ckm       | 4.11E-37 | 7.31        | Gpc1      | 4.70E-07   | 2.25        |
| 18           | Csflr     | 1.35E-09 | 2.89        | Mylpf     | 1.85E-35 | 6.94        | Emilin1   | 5.46E-07   | 2.17        |
| 19           | Cd68      | 9.40E-08 | 1.89        | Angptl2   | 1.47E-34 | 5.08        | Igfbp7    | 1.57E-06   | 1.89        |
| 20           | Ibsp      | 7.26E-07 | 2.34        | Mmp2      | 1.23E-32 | 4.37        | Fscn1     | 0.00258535 | 1.67        |
| 21           | Hexa      | 2.63E-06 | 1.81        | S100a6    | 3.92E-32 | 4.76        | Fibin     | 0.00853956 | 1.66        |
| 22           | Spp1      | 4.58E-06 | 2.52        | Aldoa     | 1.53E-31 | 2.92        | Mmp9      | 0.23071441 | 1.60        |
| 23           | Tmem176b  | 1.95E-05 | 1.86        | Fn1       | 1.96E-30 | 2.48        | Maged1    | 0.29991692 | 1.55        |
| 24           | Hba-a2    | 1.93E-04 | 1.91        | Plec      | 3.54E-28 | 3.30        | Fgfr1     | 0.34024572 | 1.58        |



|    |         |            |      |         |          |      |         |            |      |
|----|---------|------------|------|---------|----------|------|---------|------------|------|
| 25 | Atp6v0e | 0.00199742 | 1.79 | Igfbp7  | 5.98E-28 | 2.05 | Hnrnpab | 0.35671937 | 1.69 |
| 26 | Hbb-bs  | 0.00260241 | 1.56 | Fstl1   | 3.13E-27 | 5.08 | Mt1     | 0.56442893 | 1.71 |
| 27 | Mmp13   | 0.00487388 | 1.78 | Timp2   | 1.39E-26 | 4.30 |         |            |      |
| 28 |         |            |      | Tnnt3   | 2.20E-26 | 4.61 |         |            |      |
| 29 |         |            |      | Ybx3    | 1.77E-25 | 3.25 |         |            |      |
| 30 |         |            |      | Ahnak   | 3.54E-25 | 3.23 |         |            |      |
| 31 |         |            |      | Myh4    | 8.57E-25 | 5.55 |         |            |      |
| 32 |         |            |      | Lgals1  | 1.24E-24 | 2.75 |         |            |      |
| 33 |         |            |      | Igfbp5  | 1.53E-24 | 4.93 |         |            |      |
| 34 |         |            |      | Fth1    | 2.70E-24 | 4.20 |         |            |      |
| 35 |         |            |      | Loxl2   | 2.72E-22 | 4.40 |         |            |      |
| 36 |         |            |      | Lgals3  | 1.23E-21 | 4.67 |         |            |      |
| 37 |         |            |      | Bgn     | 2.44E-19 | 2.23 |         |            |      |
| 38 |         |            |      | Ctsl    | 3.64E-19 | 3.49 |         |            |      |
| 39 |         |            |      | Emp1    | 8.20E-19 | 3.44 |         |            |      |
| 40 |         |            |      | Hspg2   | 2.77E-18 | 2.25 |         |            |      |
| 41 |         |            |      | Tagln2  | 2.85E-18 | 2.65 |         |            |      |
| 42 |         |            |      | Fibin   | 5.75E-18 | 3.20 |         |            |      |
| 43 |         |            |      | Txn1    | 1.29E-17 | 2.53 |         |            |      |
| 44 |         |            |      | Nbl1    | 1.82E-16 | 2.15 |         |            |      |
| 45 |         |            |      | Lum     | 3.74E-16 | 2.23 |         |            |      |
| 46 |         |            |      | Antxr1  | 1.00E-14 | 2.68 |         |            |      |
| 47 |         |            |      | Jund    | 1.89E-14 | 2.00 |         |            |      |
| 48 |         |            |      | Cthrc1  | 4.96E-14 | 2.26 |         |            |      |
| 49 |         |            |      | Col4a2  | 7.92E-14 | 4.09 |         |            |      |
| 50 |         |            |      | Tuba1a  | 8.52E-14 | 1.91 |         |            |      |
| 51 |         |            |      | Ski     | 9.86E-14 | 2.10 |         |            |      |
| 52 |         |            |      | Col12a1 | 1.52E-13 | 2.33 |         |            |      |

|    |  |  |  |          |          |      |  |  |  |
|----|--|--|--|----------|----------|------|--|--|--|
| 53 |  |  |  | Cd81     | 1.85E-13 | 2.01 |  |  |  |
| 54 |  |  |  | Col4a1   | 6.35E-13 | 4.04 |  |  |  |
| 55 |  |  |  | Pkm      | 9.44E-13 | 2.56 |  |  |  |
| 56 |  |  |  | Myo1c    | 2.97E-12 | 2.49 |  |  |  |
| 57 |  |  |  | Cd44     | 5.09E-12 | 3.17 |  |  |  |
| 58 |  |  |  | Tnfrsf1a | 8.69E-12 | 2.32 |  |  |  |
| 59 |  |  |  | Apoe     | 1.30E-11 | 3.67 |  |  |  |
| 60 |  |  |  | Ywhag    | 3.48E-11 | 2.31 |  |  |  |
| 61 |  |  |  | Pmepa1   | 2.59E-10 | 1.64 |  |  |  |
| 62 |  |  |  | Ctsb     | 1.27E-09 | 1.84 |  |  |  |
| 63 |  |  |  | Col16a1  | 2.65E-09 | 1.92 |  |  |  |
| 64 |  |  |  | Tpm1     | 3.04E-09 | 2.27 |  |  |  |
| 65 |  |  |  | Actb     | 1.01E-08 | 1.89 |  |  |  |
| 66 |  |  |  | Mxra8    | 1.48E-08 | 1.90 |  |  |  |
| 67 |  |  |  | Psap     | 2.49E-08 | 1.96 |  |  |  |
| 68 |  |  |  | C1qtnf6  | 3.11E-08 | 1.60 |  |  |  |
| 69 |  |  |  | Cd47     | 9.60E-08 | 2.48 |  |  |  |
| 70 |  |  |  | Mtch1    | 1.43E-07 | 2.13 |  |  |  |
| 71 |  |  |  | Sqstm1   | 1.75E-06 | 1.87 |  |  |  |
| 72 |  |  |  | Gpi1     | 3.08E-06 | 2.01 |  |  |  |
| 73 |  |  |  | Rap1b    | 5.49E-06 | 2.12 |  |  |  |
| 74 |  |  |  | Plvap    | 8.20E-06 | 2.10 |  |  |  |
| 75 |  |  |  | Dcn      | 3.28E-05 | 1.66 |  |  |  |
| 76 |  |  |  | Gpx1     | 3.68E-05 | 2.22 |  |  |  |
| 77 |  |  |  | Tnfaip2  | 5.18E-05 | 1.50 |  |  |  |
| 78 |  |  |  | Msn      | 5.46E-05 | 1.56 |  |  |  |
| 79 |  |  |  | Ywhaz    | 1.14E-04 | 1.70 |  |  |  |
| 80 |  |  |  | Nid2     | 1.16E-04 | 1.53 |  |  |  |

|    |  |  |  |           |            |      |  |  |  |
|----|--|--|--|-----------|------------|------|--|--|--|
| 81 |  |  |  | Pdia3     | 1.31E-04   | 1.71 |  |  |  |
| 82 |  |  |  | Ubc       | 1.89E-04   | 1.69 |  |  |  |
| 83 |  |  |  | Ctsd      | 0.00139589 | 1.51 |  |  |  |
| 84 |  |  |  | Hist2h2bb | 0.00468357 | 1.63 |  |  |  |
| 85 |  |  |  | Hnrnpm    | 0.0159233  | 1.66 |  |  |  |
| 86 |  |  |  | Ube2m     | 0.01888249 | 1.58 |  |  |  |
| 87 |  |  |  | Calm1     | 0.02370051 | 1.58 |  |  |  |
| 88 |  |  |  | Pgam1     | 0.03051486 | 1.56 |  |  |  |
| 89 |  |  |  | Ssr3      | 0.07433097 | 1.50 |  |  |  |
| 90 |  |  |  | Car3      | 0.75330208 | 2.05 |  |  |  |

**Supplementary Table S4.** Unsupervised global gene clustering. Top expressed genes of each cluster sorted by p-value for the one-week MDA-MB-231 sample.

| <b>Top features</b> | <b>Cluster 1</b> | <b>p-value</b> | <b>fold change</b> | <b>Cluster 2</b> | <b>p-value</b> | <b>fold change</b> |
|---------------------|------------------|----------------|--------------------|------------------|----------------|--------------------|
| 1                   | Tgfb1            | 1.99E-18       | 11.30              | Col1a2           | 5.01E-22       | 1.77               |
| 2                   | Col6a2           | 3.80E-18       | 7.72               | Col1a1           | 1.03E-19       | 2.63               |
| 3                   | Fn1              | 2.56E-17       | 5.36               | Mmp9             | 7.71E-18       | 4.91               |
| 4                   | Tnn              | 1.60E-16       | 14.95              | Acp5             | 4.20E-15       | 5.22               |
| 5                   | Col3a1           | 2.49E-16       | 3.08               | Dmp1             | 5.87E-15       | 2.20               |
| 6                   | Angptl2          | 1.48E-12       | 7.47               | Col22a1          | 2.34E-13       | 2.18               |
| 7                   | Aebp1            | 2.26E-12       | 11.05              | Ckb              | 7.53E-13       | 8.19               |
| 8                   | Col6a1           | 1.82E-11       | 6.14               | Car3             | 2.88E-12       | 2.99               |
| 9                   | Crip1            | 6.07E-11       | 6.41               | Gja1             | 6.98E-12       | 2.21               |
| 10                  | Thbs2            | 7.37E-11       | 8.36               | Ctsk             | 2.53E-11       | 4.60               |
| 11                  | Col6a3           | 1.10E-10       | 3.17               | Mmp13            | 3.19E-10       | 11.81              |
| 12                  | Lmna             | 2.71E-10       | 2.71               | Slc4a2           | 4.40E-08       | 4.55               |
| 13                  | Postn            | 4.21E-10       | 13.52              | Nrp2             | 8.11E-08       | 1.97               |
| 14                  | Igfbp7           | 6.72E-10       | 1.87               | Hexa             | 9.08E-08       | 2.50               |
| 15                  | Fth1             | 1.33E-08       | 2.15               | Id3              | 7.35E-07       | 1.66               |
| 16                  | Col5a1           | 1.66E-08       | 3.67               | Gpc1             | 2.97E-06       | 1.62               |
| 17                  | Fibin            | 3.65E-08       | 3.91               | Bglap            | 4.13E-06       | 4.51               |
| 18                  | S100a6           | 4.53E-08       | 3.11               | Ptgis            | 7.46E-06       | 3.06               |
| 19                  | Bgn              | 1.01E-07       | 2.50               | Atp6v1e1         | 2.48E-05       | 2.44               |
| 20                  | Pmepa1           | 1.80E-07       | 2.69               | Sh3pxd2b         | 6.38E-05       | 1.71               |
| 21                  | Acan             | 1.82E-07       | 11.90              | Spp1             | 1.33E-04       | 2.32               |
| 22                  | Comp             | 6.41E-07       | 13.75              | Tnnc2            | 2.60E-04       | 2.25               |
| 23                  | Emilin1          | 8.03E-07       | 3.40               | Cyc1             | 0.00143806     | 1.74               |
| 24                  | Col9a3           | 1.37E-06       | 15.71              | Ctsz             | 0.00196439     | 1.88               |

|    |         |            |       |          |            |      |
|----|---------|------------|-------|----------|------------|------|
| 25 | Grb10   | 2.67E-06   | 4.08  | Cd68     | 0.00370229 | 1.88 |
| 26 | Smoc2   | 2.69E-06   | 1.88  | Ckm      | 0.00448134 | 1.89 |
| 27 | Pdia3   | 3.57E-06   | 2.06  | Tmem176b | 0.0060072  | 1.63 |
| 28 | Igfbp5  | 1.22E-05   | 2.20  | Creb3l1  | 0.0063904  | 1.68 |
| 29 | Mgp     | 1.34E-05   | 6.62  | Tnnt3    | 0.00884771 | 2.53 |
| 30 | Mmp2    | 1.40E-05   | 1.87  | Ctsa     | 0.00884807 | 1.60 |
| 31 | Jund    | 3.22E-05   | 2.36  | Uqcrc1   | 0.01471704 | 1.52 |
| 32 | Fstl1   | 4.23E-05   | 3.58  | Myh4     | 0.01853007 | 1.91 |
| 33 | Col9a1  | 4.73E-05   | 14.00 | Mylpf    | 0.02335842 | 1.76 |
| 34 | Tagln2  | 5.07E-05   | 2.32  | Ahcyl1   | 0.04906869 | 1.51 |
| 35 | Myo1c   | 5.56E-05   | 1.98  | Slc39a7  | 0.06207363 | 1.85 |
| 36 | Apoe    | 5.90E-05   | 9.98  | Atp6v0e  | 0.11104512 | 1.51 |
| 37 | Loxl2   | 6.33E-05   | 3.39  | Tnc      | 0.27646613 | 1.97 |
| 38 | Timp2   | 6.77E-05   | 1.76  | Hist4h4  | 0.49098454 | 1.64 |
| 39 | Pkm     | 8.52E-05   | 1.89  | Slc25a5  | 0.59083628 | 2.06 |
| 40 | Cd81    | 1.12E-04   | 1.94  | Mt1      | 0.62433476 | 1.54 |
| 41 | Hspg2   | 1.55E-04   | 1.79  |          |            |      |
| 42 | Hsp90b1 | 1.79E-04   | 1.56  |          |            |      |
| 43 | Col9a2  | 2.35E-04   | 10.28 |          |            |      |
| 44 | Tuba1a  | 3.51E-04   | 2.44  |          |            |      |
| 45 | Ppib    | 4.21E-04   | 1.77  |          |            |      |
| 46 | Ckap4   | 4.52E-04   | 1.56  |          |            |      |
| 47 | Surf4   | 5.01E-04   | 1.53  |          |            |      |
| 48 | Ctsl    | 5.13E-04   | 2.50  |          |            |      |
| 49 | Sdc4    | 8.16E-04   | 2.73  |          |            |      |
| 50 | Ddb1    | 0.00110138 | 1.63  |          |            |      |
| 51 | Thbs1   | 0.0012533  | 1.57  |          |            |      |
| 52 | Col2a1  | 0.00125895 | 8.18  |          |            |      |

|    |          |            |      |  |  |  |
|----|----------|------------|------|--|--|--|
| 53 | Vim      | 0.00223164 | 1.79 |  |  |  |
| 54 | Myl12a   | 0.00282791 | 1.72 |  |  |  |
| 55 | Cthrc1   | 0.00332182 | 1.66 |  |  |  |
| 56 | Ctsb     | 0.00384687 | 3.23 |  |  |  |
| 57 | Mtch1    | 0.00482792 | 2.05 |  |  |  |
| 58 | Rbp4     | 0.00510327 | 3.41 |  |  |  |
| 59 | Fscn1    | 0.00574327 | 1.76 |  |  |  |
| 60 | Tmsb4x   | 0.00628898 | 2.22 |  |  |  |
| 61 | Col12a1  | 0.00633081 | 2.23 |  |  |  |
| 62 | Sar1a    | 0.00690348 | 1.50 |  |  |  |
| 63 | Tnfrsf1a | 0.0081746  | 1.63 |  |  |  |
| 64 | Lgals1   | 0.00916693 | 1.84 |  |  |  |
| 65 | Rabac1   | 0.00998772 | 1.62 |  |  |  |
| 66 | Rer1     | 0.01183203 | 1.70 |  |  |  |
| 67 | H2afz    | 0.01385191 | 1.69 |  |  |  |
| 68 | Txn1     | 0.01447579 | 1.94 |  |  |  |
| 69 | Maged1   | 0.01690518 | 1.51 |  |  |  |
| 70 | Arhgdia  | 0.02055006 | 1.66 |  |  |  |
| 71 | Plec     | 0.0235455  | 1.99 |  |  |  |
| 72 | Ptbp1    | 0.03015833 | 1.57 |  |  |  |
| 73 | Gpi1     | 0.03269063 | 2.08 |  |  |  |
| 74 | Cspg4    | 0.03691878 | 3.25 |  |  |  |
| 75 | Ecm1     | 0.04542868 | 1.66 |  |  |  |
| 76 | C1qtnf6  | 0.06759725 | 2.13 |  |  |  |
| 77 | Nbl1     | 0.06965241 | 1.92 |  |  |  |
| 78 | App      | 0.10396289 | 1.57 |  |  |  |
| 79 | Akt1     | 0.16513958 | 1.53 |  |  |  |
| 80 | Sfpq     | 0.19742708 | 1.65 |  |  |  |

|    |        |            |      |  |  |  |
|----|--------|------------|------|--|--|--|
| 81 | Lgals3 | 0.24769173 | 1.74 |  |  |  |
| 82 | Gnb2   | 0.51315775 | 1.62 |  |  |  |

**Supplementary Table S5.** Complete differential gene list of the comparison of the two-week MDA-MB-231 hard callus and the two-week wild-type hard callus. Gene list calculated by ANOVA and filtered by p-value <0.05, false discovery rate (FDR) <0.01, and fold change at least from -1 to 1.

| <b>Gene</b> | <b>P-value</b> | <b>FDR step<br/>up</b> | <b>Ratio</b> | <b>Fold<br/>change</b> | <b>LSMean(MDA-<br/>231)</b> | <b>LSMean(WT)</b> |
|-------------|----------------|------------------------|--------------|------------------------|-----------------------------|-------------------|
| Acta1       | 1.01E-18       | 2.92E-16               | 4.38E-01     | 0.44                   | -2.28                       | 2.40              |
| Sem1        | 8.59E-17       | 1.24E-14               | 1.64E+00     | 1.64                   | 1.64                        | 4.33              |
| Ckm         | 7.27E-16       | 7.00E-14               | 5.57E-01     | 0.56                   | -1.80                       | 1.78              |
| Hba-a2      | 4.64E-14       | 3.35E-12               | 2.28E+00     | 2.28                   | 2.28                        | 3.60              |
| Tnnc2       | 4.93E-12       | 2.85E-10               | 6.58E-01     | 0.66                   | -1.52                       | 2.15              |
| Aldoa       | 8.33E-11       | 4.01E-09               | 7.22E-01     | 0.72                   | -1.39                       | 2.08              |
| Mylpf       | 2.51E-10       | 1.04E-08               | 7.11E-01     | 0.71                   | -1.41                       | 1.46              |
| Pgam2       | 1.10E-09       | 3.97E-08               | 8.03E-01     | 0.80                   | -1.25                       | 1.06              |
| Pvalb       | 4.20E-09       | 1.35E-07               | 7.53E-01     | 0.75                   | -1.33                       | 1.17              |
| Tnc         | 3.13E-08       | 9.03E-07               | 5.76E-01     | 0.58                   | -1.74                       | 4.76              |
| Bglap       | 3.60E-08       | 9.47E-07               | 4.91E-01     | 0.49                   | -2.04                       | 16.18             |
| Selenop     | 2.46E-07       | 5.92E-06               | 6.65E-01     | 0.67                   | -1.50                       | 2.09              |
| Thbs1       | 4.08E-07       | 8.68E-06               | 6.38E-01     | 0.64                   | -1.57                       | 3.36              |
| Col12a1     | 4.21E-07       | 8.68E-06               | 7.27E-01     | 0.73                   | -1.38                       | 1.73              |
| Igfbp5      | 1.35E-06       | 2.61E-05               | 7.53E-01     | 0.75                   | -1.33                       | 1.43              |
| Eno3        | 1.67E-06       | 2.91E-05               | 7.60E-01     | 0.76                   | -1.32                       | 1.33              |
| Tpm1        | 1.71E-06       | 2.91E-05               | 7.52E-01     | 0.75                   | -1.33                       | 4.39              |
| Actn3       | 2.08E-06       | 3.34E-05               | 8.38E-01     | 0.84                   | -1.19                       | 1.15              |
| Tcap        | 5.17E-06       | 7.87E-05               | 8.48E-01     | 0.85                   | -1.18                       | 1.14              |
| Ndufb7      | 5.85E-06       | 8.22E-05               | 7.94E-01     | 0.79                   | -1.26                       | 1.52              |
| Col4a2      | 5.97E-06       | 8.22E-05               | 7.27E-01     | 0.73                   | -1.38                       | 1.90              |
| Myoz1       | 8.07E-06       | 1.06E-04               | 8.31E-01     | 0.83                   | -1.20                       | 1.14              |
| Cthrc1      | 1.05E-05       | 1.32E-04               | 6.99E-01     | 0.70                   | -1.43                       | 2.07              |
| Tnnt3       | 1.16E-05       | 1.39E-04               | 7.82E-01     | 0.78                   | -1.28                       | 1.49              |



|         |          |          |          |      |       |      |
|---------|----------|----------|----------|------|-------|------|
| Myh4    | 1.29E-05 | 1.50E-04 | 7.82E-01 | 0.78 | -1.28 | 1.87 |
| App     | 1.84E-05 | 2.04E-04 | 7.39E-01 | 0.74 | -1.35 | 3.21 |
| Mdh1    | 2.02E-05 | 2.15E-04 | 7.50E-01 | 0.75 | -1.33 | 1.67 |
| Lum     | 2.10E-05 | 2.15E-04 | 7.44E-01 | 0.74 | -1.34 | 2.16 |
| Atp2a1  | 2.16E-05 | 2.15E-04 | 8.08E-01 | 0.81 | -1.24 | 1.39 |
| Cycl    | 2.51E-05 | 2.42E-04 | 7.65E-01 | 0.77 | -1.31 | 2.00 |
| Mybpc2  | 3.35E-05 | 3.09E-04 | 8.07E-01 | 0.81 | -1.24 | 1.25 |
| Itm2c   | 3.42E-05 | 3.09E-04 | 7.29E-01 | 0.73 | -1.37 | 2.21 |
| Col6a2  | 4.58E-05 | 4.01E-04 | 7.39E-01 | 0.74 | -1.35 | 3.23 |
| Eef1a1  | 4.71E-05 | 4.01E-04 | 6.76E-01 | 0.68 | -1.48 | 5.43 |
| Maf     | 6.20E-05 | 5.12E-04 | 8.03E-01 | 0.80 | -1.25 | 1.61 |
| Ubc     | 7.10E-05 | 5.70E-04 | 7.97E-01 | 0.80 | -1.25 | 1.71 |
| Fn1     | 1.17E-04 | 9.12E-04 | 6.76E-01 | 0.68 | -1.48 | 4.28 |
| Pygm    | 1.23E-04 | 9.33E-04 | 8.74E-01 | 0.87 | -1.14 | 1.16 |
| Rap1b   | 1.44E-04 | 1.07E-03 | 8.10E-01 | 0.81 | -1.23 | 1.83 |
| Myl1    | 1.55E-04 | 1.12E-03 | 8.13E-01 | 0.81 | -1.23 | 1.27 |
| Tnni2   | 1.59E-04 | 1.12E-03 | 9.00E-01 | 0.90 | -1.11 | 1.04 |
| Ckb     | 1.78E-04 | 1.22E-03 | 6.71E-01 | 0.67 | -1.49 | 3.43 |
| Tln1    | 2.22E-04 | 1.49E-03 | 8.24E-01 | 0.82 | -1.21 | 1.62 |
| Calm1   | 4.06E-04 | 2.66E-03 | 8.26E-01 | 0.83 | -1.21 | 1.66 |
| Olfml2b | 4.19E-04 | 2.69E-03 | 7.73E-01 | 0.77 | -1.29 | 1.89 |
| Arhgdia | 4.31E-04 | 2.70E-03 | 8.06E-01 | 0.81 | -1.24 | 1.63 |
| Naca    | 4.40E-04 | 2.70E-03 | 8.05E-01 | 0.81 | -1.24 | 2.02 |
| Lgals3  | 4.84E-04 | 2.91E-03 | 8.02E-01 | 0.80 | -1.25 | 1.61 |
| Cox6a2  | 5.06E-04 | 2.99E-03 | 9.22E-01 | 0.92 | -1.08 | 1.04 |
| Cox5b   | 5.41E-04 | 3.13E-03 | 7.80E-01 | 0.78 | -1.28 | 2.28 |
| Clta    | 6.34E-04 | 3.59E-03 | 8.14E-01 | 0.81 | -1.23 | 2.15 |
| Vim     | 8.29E-04 | 4.59E-03 | 7.96E-01 | 0.80 | -1.26 | 2.37 |
| Atp5b   | 8.41E-04 | 4.59E-03 | 8.23E-01 | 0.82 | -1.22 | 1.51 |

|          |          |          |          |      |       |       |
|----------|----------|----------|----------|------|-------|-------|
| Rack1    | 8.80E-04 | 4.71E-03 | 7.43E-01 | 0.74 | -1.35 | 6.08  |
| Cct3     | 9.51E-04 | 4.97E-03 | 8.51E-01 | 0.85 | -1.18 | 1.56  |
| Psmb4    | 9.64E-04 | 4.97E-03 | 8.44E-01 | 0.84 | -1.18 | 1.76  |
| Marcks   | 9.87E-04 | 5.00E-03 | 8.07E-01 | 0.81 | -1.24 | 1.71  |
| Ckap4    | 1.03E-03 | 5.14E-03 | 7.92E-01 | 0.79 | -1.26 | 3.09  |
| Mxra8    | 1.05E-03 | 5.14E-03 | 7.95E-01 | 0.79 | -1.26 | 1.95  |
| Atp6v1e1 | 1.07E-03 | 5.17E-03 | 7.86E-01 | 0.79 | -1.27 | 2.18  |
| Atp5a1   | 1.16E-03 | 5.48E-03 | 8.17E-01 | 0.82 | -1.22 | 2.29  |
| Antxr1   | 1.32E-03 | 6.09E-03 | 8.25E-01 | 0.83 | -1.21 | 1.61  |
| Myh1     | 1.33E-03 | 6.09E-03 | 8.68E-01 | 0.87 | -1.15 | 1.15  |
| Hspg2    | 1.37E-03 | 6.17E-03 | 7.97E-01 | 0.80 | -1.25 | 2.29  |
| H3f3b    | 1.39E-03 | 6.20E-03 | 7.91E-01 | 0.79 | -1.26 | 1.76  |
| Ryr1     | 1.45E-03 | 6.35E-03 | 9.09E-01 | 0.91 | -1.10 | 1.12  |
| Gnas     | 1.49E-03 | 6.44E-03 | 7.89E-01 | 0.79 | -1.27 | 4.80  |
| Ybx3     | 1.66E-03 | 7.06E-03 | 8.49E-01 | 0.85 | -1.18 | 1.47  |
| Psap     | 1.74E-03 | 7.31E-03 | 7.55E-01 | 0.76 | -1.32 | 3.69  |
| Col3a1   | 1.82E-03 | 7.50E-03 | 7.66E-01 | 0.77 | -1.31 | 12.52 |
| Akr1a1   | 1.98E-03 | 8.05E-03 | 8.06E-01 | 0.81 | -1.24 | 2.09  |

**Supplementary Table S6.** Complete differential gene list of the comparison of the two-week MDA-MB-231 soft callus and the two-week wild-type soft callus. Gene list calculated by ANOVA and filtered by p-value <0.05, false discovery rate (FDR) <0.01, and fold change at least from -1 to 1.

| <b>Gene</b> | <b>P-value</b> | <b>FDR step<br/>up</b> | <b>Ratio</b> | <b>Fold<br/>change</b> | <b>LSMean(MDA-<br/>231)</b> | <b>LSMean(WT)</b> |
|-------------|----------------|------------------------|--------------|------------------------|-----------------------------|-------------------|
| Col12a1     | 7.10E-09       | 2.05E-06               | 4.95E-01     | -2.02                  | 1.42                        | 2.86              |
| Gpx3        | 2.60E-08       | 3.76E-06               | 5.67E-01     | -1.76                  | 4.36                        | 7.68              |
| Col6a1      | 6.20E-08       | 4.93E-06               | 5.71E-01     | -1.75                  | 2.07                        | 3.63              |
| Eef1a1      | 6.83E-08       | 4.93E-06               | 5.25E-01     | -1.90                  | 4.13                        | 7.86              |
| Arf4        | 1.40E-07       | 8.09E-06               | 5.93E-01     | -1.69                  | 1.56                        | 2.63              |
| H3f3b       | 6.61E-07       | 2.86E-05               | 6.38E-01     | -1.57                  | 1.38                        | 2.16              |
| Lum         | 6.92E-07       | 2.86E-05               | 5.60E-01     | -1.79                  | 1.69                        | 3.02              |
| Col5a2      | 1.70E-06       | 5.60E-05               | 5.09E-01     | -1.97                  | 5.70                        | 11.21             |
| Col5a1      | 1.74E-06       | 5.60E-05               | 4.94E-01     | -2.02                  | 4.08                        | 8.27              |
| Mmp2        | 3.14E-06       | 9.07E-05               | 5.66E-01     | -1.77                  | 2.19                        | 3.87              |
| Itm2c       | 4.61E-06       | 1.21E-04               | 6.21E-01     | -1.61                  | 1.77                        | 2.86              |
| Sparc       | 5.51E-06       | 1.33E-04               | 4.85E-01     | -2.06                  | 5.87                        | 12.10             |
| Myh4        | 1.22E-05       | 2.60E-04               | 1.47E+00     | 1.47                   | 2.71                        | 1.85              |
| Thbs1       | 1.26E-05       | 2.60E-04               | 5.95E-01     | -1.68                  | 3.15                        | 5.30              |
| Fkbp8       | 1.98E-05       | 3.81E-04               | 7.09E-01     | -1.41                  | 1.58                        | 2.23              |
| Olfml2b     | 2.71E-05       | 4.89E-04               | 6.50E-01     | -1.54                  | 1.38                        | 2.12              |
| Tgfb1       | 3.11E-05       | 5.10E-04               | 6.53E-01     | -1.53                  | 1.69                        | 2.59              |
| Actb        | 3.18E-05       | 5.10E-04               | 6.44E-01     | -1.55                  | 5.55                        | 8.61              |
| Ctsb        | 3.35E-05       | 5.10E-04               | 6.09E-01     | -1.64                  | 1.96                        | 3.23              |
| Aebp1       | 4.40E-05       | 6.36E-04               | 6.36E-01     | -1.57                  | 1.88                        | 2.96              |
| Tpt1        | 5.43E-05       | 7.47E-04               | 6.21E-01     | -1.61                  | 2.43                        | 3.91              |
| Hspg2       | 6.55E-05       | 8.60E-04               | 6.16E-01     | -1.62                  | 2.90                        | 4.71              |
| Psap        | 7.28E-05       | 9.14E-04               | 7.08E-01     | -1.41                  | 3.00                        | 4.24              |
| Col6a2      | 7.60E-05       | 9.15E-04               | 6.00E-01     | -1.67                  | 5.87                        | 9.79              |

|          |          |          |          |       |       |       |
|----------|----------|----------|----------|-------|-------|-------|
| Cox6a1   | 1.07E-04 | 1.13E-03 | 7.24E-01 | -1.38 | 1.55  | 2.14  |
| Mxra8    | 1.09E-04 | 1.13E-03 | 6.33E-01 | -1.58 | 1.68  | 2.65  |
| Ptms     | 1.09E-04 | 1.13E-03 | 7.09E-01 | -1.41 | 2.35  | 3.31  |
| Serpinf1 | 1.09E-04 | 1.13E-03 | 6.79E-01 | -1.47 | 1.46  | 2.16  |
| Cthrc1   | 1.27E-04 | 1.27E-03 | 6.24E-01 | -1.60 | 1.83  | 2.94  |
| Ptp4a3   | 1.55E-04 | 1.49E-03 | 8.02E-01 | -1.25 | 1.07  | 1.34  |
| Ski      | 1.61E-04 | 1.50E-03 | 6.92E-01 | -1.45 | 1.37  | 1.98  |
| Serf2    | 1.77E-04 | 1.60E-03 | 7.22E-01 | -1.38 | 1.52  | 2.11  |
| Col6a3   | 1.92E-04 | 1.68E-03 | 6.85E-01 | -1.46 | 3.36  | 4.90  |
| Dcn      | 1.97E-04 | 1.68E-03 | 6.67E-01 | -1.50 | 1.57  | 2.36  |
| Tnc      | 2.17E-04 | 1.79E-03 | 5.94E-01 | -1.68 | 2.13  | 3.59  |
| Tnfrsf1a | 2.34E-04 | 1.88E-03 | 7.29E-01 | -1.37 | 1.64  | 2.25  |
| Mylpf    | 2.49E-04 | 1.92E-03 | 1.44E+00 | 1.44  | 2.51  | 1.74  |
| Calm2    | 2.52E-04 | 1.92E-03 | 7.60E-01 | -1.32 | 2.02  | 2.66  |
| Vim      | 2.83E-04 | 2.06E-03 | 6.53E-01 | -1.53 | 2.82  | 4.32  |
| Col3a1   | 2.86E-04 | 2.06E-03 | 4.43E-01 | -2.26 | 19.44 | 43.88 |
| Thbs2    | 3.02E-04 | 2.13E-03 | 5.28E-01 | -1.89 | 1.88  | 3.56  |
| Ctss     | 3.17E-04 | 2.16E-03 | 6.98E-01 | -1.43 | 1.19  | 1.71  |
| Ubc      | 3.21E-04 | 2.16E-03 | 7.55E-01 | -1.32 | 1.46  | 1.94  |
| Rack1    | 3.75E-04 | 2.42E-03 | 6.94E-01 | -1.44 | 4.86  | 7.00  |
| Myl12a   | 3.77E-04 | 2.42E-03 | 7.42E-01 | -1.35 | 1.94  | 2.62  |
| Gas6     | 3.92E-04 | 2.46E-03 | 7.55E-01 | -1.32 | 1.14  | 1.51  |
| Gnai2    | 4.42E-04 | 2.72E-03 | 7.11E-01 | -1.41 | 2.14  | 3.01  |
| Sem1     | 4.83E-04 | 2.91E-03 | 1.29E+00 | 1.29  | 2.92  | 2.27  |
| Lgals3   | 5.11E-04 | 2.99E-03 | 7.06E-01 | -1.42 | 2.52  | 3.58  |
| Mgp      | 5.17E-04 | 2.99E-03 | 1.20E+00 | 1.20  | 9.44  | 7.88  |
| Lman1    | 5.30E-04 | 3.01E-03 | 6.78E-01 | -1.48 | 2.21  | 3.27  |
| Fth1     | 5.78E-04 | 3.21E-03 | 7.24E-01 | -1.38 | 6.77  | 9.36  |
| Ywhaz    | 6.37E-04 | 3.47E-03 | 7.29E-01 | -1.37 | 1.49  | 2.04  |

|          |          |          |          |       |       |       |
|----------|----------|----------|----------|-------|-------|-------|
| Pabpc1   | 6.56E-04 | 3.51E-03 | 7.48E-01 | -1.34 | 1.36  | 1.82  |
| Tln1     | 7.38E-04 | 3.87E-03 | 7.78E-01 | -1.29 | 1.32  | 1.70  |
| Bmp1     | 7.52E-04 | 3.87E-03 | 6.79E-01 | -1.47 | 1.76  | 2.60  |
| Arhgdia  | 7.63E-04 | 3.87E-03 | 7.60E-01 | -1.32 | 1.58  | 2.08  |
| Cd81     | 8.99E-04 | 4.42E-03 | 6.79E-01 | -1.47 | 1.64  | 2.42  |
| Pcolce   | 9.03E-04 | 4.42E-03 | 6.63E-01 | -1.51 | 1.55  | 2.34  |
| Ctsl     | 9.51E-04 | 4.58E-03 | 5.79E-01 | -1.73 | 2.55  | 4.40  |
| Rcn3     | 9.83E-04 | 4.66E-03 | 6.94E-01 | -1.44 | 1.95  | 2.82  |
| App      | 1.05E-03 | 4.89E-03 | 6.69E-01 | -1.49 | 2.67  | 3.99  |
| Sept2    | 1.24E-03 | 5.66E-03 | 7.71E-01 | -1.30 | 1.60  | 2.07  |
| Bgn      | 1.26E-03 | 5.66E-03 | 7.10E-01 | -1.41 | 3.31  | 4.66  |
| Tgfb1    | 1.27E-03 | 5.66E-03 | 7.45E-01 | -1.34 | 1.89  | 2.54  |
| Naca     | 1.35E-03 | 5.92E-03 | 7.09E-01 | -1.41 | 1.80  | 2.53  |
| Fn1      | 1.45E-03 | 6.26E-03 | 7.04E-01 | -1.42 | 12.39 | 17.61 |
| Serpinh1 | 1.51E-03 | 6.35E-03 | 6.05E-01 | -1.65 | 3.01  | 4.98  |
| Ssr3     | 1.52E-03 | 6.35E-03 | 7.14E-01 | -1.40 | 1.79  | 2.50  |
| Cd47     | 1.54E-03 | 6.35E-03 | 7.70E-01 | -1.30 | 1.35  | 1.75  |
| Sfpq     | 1.61E-03 | 6.52E-03 | 7.54E-01 | -1.33 | 1.61  | 2.13  |
| Erh      | 1.63E-03 | 6.52E-03 | 7.57E-01 | -1.32 | 1.49  | 1.97  |
| Akr1a1   | 1.65E-03 | 6.52E-03 | 7.78E-01 | -1.29 | 1.68  | 2.16  |
| Surf4    | 1.78E-03 | 6.89E-03 | 7.32E-01 | -1.37 | 1.77  | 2.42  |
| Ctsa     | 1.79E-03 | 6.89E-03 | 7.88E-01 | -1.27 | 1.39  | 1.77  |
| Id3      | 2.03E-03 | 7.62E-03 | 6.85E-01 | -1.46 | 1.77  | 2.59  |
| Gnas     | 2.04E-03 | 7.62E-03 | 6.75E-01 | -1.48 | 3.45  | 5.12  |
| Mdh1     | 2.06E-03 | 7.62E-03 | 7.91E-01 | -1.26 | 1.27  | 1.61  |
| Ckap4    | 2.39E-03 | 8.71E-03 | 6.98E-01 | -1.43 | 2.57  | 3.68  |
| S100a6   | 2.41E-03 | 8.71E-03 | 7.91E-01 | -1.26 | 1.57  | 1.99  |
| Lgals1   | 2.54E-03 | 9.08E-03 | 7.25E-01 | -1.38 | 2.10  | 2.89  |
| Slc25a5  | 2.65E-03 | 9.34E-03 | 7.42E-01 | -1.35 | 1.85  | 2.49  |

|         |          |          |          |       |      |      |
|---------|----------|----------|----------|-------|------|------|
| Laptn4a | 2.83E-03 | 9.69E-03 | 7.40E-01 | -1.35 | 2.60 | 3.51 |
| Ppib    | 2.83E-03 | 9.69E-03 | 7.65E-01 | -1.31 | 1.79 | 2.34 |
| Atp2a1  | 2.85E-03 | 9.69E-03 | 1.26E+00 | 1.26  | 1.94 | 1.53 |
| Cnn2    | 2.97E-03 | 9.97E-03 | 7.24E-01 | -1.38 | 1.57 | 2.17 |

**Supplementary Table S7.** Complete differential gene list of the comparison of the two-week MDA-MB-231 interzone and the two-week wild-type interzone. Gene list calculated by ANOVA and filtered by p-value <0.05, false discovery rate (FDR) <0.01, and fold change at least from -1 to 1.

| <b>Gene</b> | <b>P-value</b> | <b>FDR step<br/>up</b> | <b>Ratio</b> | <b>Fold<br/>change</b> | <b>LSMean(MDA-<br/>231)</b> | <b>LSMean(WT)</b> |
|-------------|----------------|------------------------|--------------|------------------------|-----------------------------|-------------------|
| Ctsl        | 3.93E-15       | 7.34E-13               | 1.79E-01     | -5.59                  | 4.32                        | 24.14             |
| Ctsd        | 5.08E-15       | 7.34E-13               | 3.16E-01     | -3.17                  | 1.79                        | 5.67              |
| Spp1        | 1.05E-11       | 1.01E-09               | 2.91E-01     | -3.44                  | 1.47                        | 5.06              |
| Cd68        | 1.84E-11       | 1.33E-09               | 3.74E-01     | -2.67                  | 1.38                        | 3.67              |
| Atp6v0e     | 2.37E-11       | 1.37E-09               | 4.95E-01     | -2.02                  | 2.11                        | 4.27              |
| B2m         | 4.63E-10       | 2.23E-08               | 4.45E-01     | -2.25                  | 1.63                        | 3.65              |
| Ctsb        | 7.06E-10       | 2.69E-08               | 3.66E-01     | -2.73                  | 3.81                        | 10.41             |
| Actb        | 7.45E-10       | 2.69E-08               | 5.04E-01     | -1.98                  | 10.04                       | 19.92             |
| Acp5        | 1.22E-09       | 3.93E-08               | 3.43E-01     | -2.92                  | 1.82                        | 5.31              |
| Apoe        | 2.83E-09       | 8.19E-08               | 3.16E-01     | -3.16                  | 3.01                        | 9.53              |
| Ckb         | 1.30E-08       | 3.35E-07               | 4.83E-01     | -2.07                  | 1.22                        | 2.53              |
| Ctss        | 1.39E-08       | 3.35E-07               | 3.57E-01     | -2.80                  | 2.39                        | 6.69              |
| Psap        | 8.60E-08       | 1.86E-06               | 4.10E-01     | -2.44                  | 5.00                        | 12.18             |
| Ctsz        | 8.99E-08       | 1.86E-06               | 4.69E-01     | -2.13                  | 1.88                        | 4.00              |
| Tnnc2       | 1.98E-07       | 3.81E-06               | 1.80E+00     | 1.80                   | 7.43                        | 4.12              |
| Mylpf       | 3.57E-07       | 6.44E-06               | 1.79E+00     | 1.79                   | 3.88                        | 2.16              |
| Cyba        | 6.18E-07       | 1.05E-05               | 5.09E-01     | -1.97                  | 1.89                        | 3.71              |
| Col2a1      | 6.62E-07       | 1.06E-05               | 2.14E-01     | -4.68                  | 13.78                       | 64.45             |
| Mmp9        | 7.19E-07       | 1.09E-05               | 4.30E-01     | -2.32                  | 1.89                        | 4.39              |
| Itm2b       | 9.29E-07       | 1.34E-05               | 5.89E-01     | -1.70                  | 3.47                        | 5.90              |
| Tgm2        | 1.15E-06       | 1.58E-05               | 5.71E-01     | -1.75                  | 1.67                        | 2.92              |
| Calm1       | 1.42E-06       | 1.87E-05               | 5.66E-01     | -1.77                  | 1.58                        | 2.80              |
| Eef2        | 1.51E-06       | 1.90E-05               | 6.16E-01     | -1.62                  | 2.92                        | 4.73              |
| Acta1       | 1.63E-06       | 1.96E-05               | 1.63E+00     | 1.63                   | 12.49                       | 7.65              |

|         |          |          |          |       |       |       |
|---------|----------|----------|----------|-------|-------|-------|
| Tnnt3   | 2.63E-06 | 2.98E-05 | 1.64E+00 | 1.64  | 3.32  | 2.02  |
| Cst3    | 2.68E-06 | 2.98E-05 | 6.04E-01 | -1.66 | 3.74  | 6.18  |
| Grn     | 3.33E-06 | 3.56E-05 | 4.96E-01 | -2.02 | 2.08  | 4.20  |
| Thbs4   | 3.62E-06 | 3.73E-05 | 2.21E+00 | 2.21  | 4.15  | 1.88  |
| Gusb    | 5.31E-06 | 5.30E-05 | 5.65E-01 | -1.77 | 1.83  | 3.24  |
| Gnai2   | 9.98E-06 | 9.62E-05 | 6.48E-01 | -1.54 | 2.81  | 4.33  |
| Mmp13   | 1.21E-05 | 1.13E-04 | 5.78E-01 | -1.73 | 1.40  | 2.43  |
| Tln1    | 1.36E-05 | 1.23E-04 | 6.50E-01 | -1.54 | 1.47  | 2.27  |
| Cdkn1a  | 1.58E-05 | 1.38E-04 | 5.83E-01 | -1.72 | 1.82  | 3.12  |
| Hspa5   | 1.91E-05 | 1.63E-04 | 6.41E-01 | -1.56 | 2.47  | 3.86  |
| Tpt1    | 1.98E-05 | 1.64E-04 | 6.48E-01 | -1.54 | 3.58  | 5.53  |
| Lgals3  | 2.09E-05 | 1.68E-04 | 4.22E-01 | -2.37 | 3.74  | 8.86  |
| Ctsa    | 2.36E-05 | 1.85E-04 | 5.97E-01 | -1.68 | 1.87  | 3.14  |
| Sqstm1  | 2.49E-05 | 1.90E-04 | 6.54E-01 | -1.53 | 2.39  | 3.65  |
| Tmsb4x  | 2.96E-05 | 2.16E-04 | 6.26E-01 | -1.60 | 3.50  | 5.59  |
| Sdcbp   | 2.99E-05 | 2.16E-04 | 6.09E-01 | -1.64 | 1.54  | 2.53  |
| H3f3b   | 3.44E-05 | 2.43E-04 | 6.25E-01 | -1.60 | 2.01  | 3.22  |
| Fth1    | 5.23E-05 | 3.60E-04 | 4.32E-01 | -2.31 | 11.89 | 27.49 |
| Myh4    | 5.49E-05 | 3.69E-04 | 1.75E+00 | 1.75  | 4.36  | 2.49  |
| Ctsk    | 5.93E-05 | 3.90E-04 | 4.89E-01 | -2.05 | 2.79  | 5.71  |
| Ckm     | 7.86E-05 | 5.05E-04 | 1.37E+00 | 1.37  | 6.46  | 4.71  |
| Igfbp7  | 8.20E-05 | 5.15E-04 | 6.36E-01 | -1.57 | 8.76  | 13.78 |
| Ctnnb1  | 1.05E-04 | 6.46E-04 | 6.93E-01 | -1.44 | 2.33  | 3.37  |
| Akr1a1  | 1.10E-04 | 6.62E-04 | 6.32E-01 | -1.58 | 2.17  | 3.43  |
| Ubc     | 1.19E-04 | 6.73E-04 | 6.52E-01 | -1.53 | 1.92  | 2.94  |
| Laptn4a | 1.22E-04 | 6.73E-04 | 6.68E-01 | -1.50 | 3.04  | 4.55  |
| App     | 1.22E-04 | 6.73E-04 | 6.68E-01 | -1.50 | 3.58  | 5.37  |
| Gpx1    | 1.23E-04 | 6.73E-04 | 6.26E-01 | -1.60 | 1.76  | 2.82  |
| Eef1a1  | 1.23E-04 | 6.73E-04 | 6.34E-01 | -1.58 | 5.81  | 9.16  |



|           |          |          |          |       |      |      |
|-----------|----------|----------|----------|-------|------|------|
| Clta      | 1.42E-04 | 7.62E-04 | 6.76E-01 | -1.48 | 2.18 | 3.22 |
| Cox5b     | 1.60E-04 | 8.33E-04 | 6.68E-01 | -1.50 | 2.22 | 3.33 |
| Gpc1      | 1.61E-04 | 8.33E-04 | 6.41E-01 | -1.56 | 2.68 | 4.18 |
| Alpl      | 1.91E-04 | 9.70E-04 | 6.05E-01 | -1.65 | 1.56 | 2.57 |
| Cfl1      | 2.06E-04 | 1.03E-03 | 6.65E-01 | -1.50 | 3.03 | 4.55 |
| Rack1     | 2.41E-04 | 1.18E-03 | 7.29E-01 | -1.37 | 6.10 | 8.37 |
| Ibsp      | 2.73E-04 | 1.32E-03 | 7.06E-01 | -1.42 | 1.15 | 1.63 |
| Myl1      | 3.58E-04 | 1.70E-03 | 1.39E+00 | 1.39  | 2.40 | 1.73 |
| Ywhaz     | 5.65E-04 | 2.63E-03 | 7.27E-01 | -1.38 | 2.18 | 3.00 |
| Eif4b     | 6.36E-04 | 2.92E-03 | 7.05E-01 | -1.42 | 1.62 | 2.31 |
| Ddx5      | 9.56E-04 | 4.32E-03 | 6.97E-01 | -1.43 | 1.72 | 2.47 |
| Atp6v1e1  | 1.20E-03 | 5.36E-03 | 6.92E-01 | -1.45 | 1.74 | 2.51 |
| Sdc4      | 1.28E-03 | 5.40E-03 | 7.06E-01 | -1.42 | 1.96 | 2.78 |
| Hbb-bs    | 1.29E-03 | 5.40E-03 | 1.95E+00 | 1.95  | 2.43 | 1.24 |
| Pvalb     | 1.29E-03 | 5.40E-03 | 1.33E+00 | 1.33  | 2.39 | 1.80 |
| Gja1      | 1.29E-03 | 5.40E-03 | 7.19E-01 | -1.39 | 2.10 | 2.92 |
| Cnn2      | 1.75E-03 | 7.22E-03 | 7.37E-01 | -1.36 | 1.82 | 2.47 |
| Hba-a2    | 1.77E-03 | 7.22E-03 | 1.81E+00 | 1.81  | 2.22 | 1.22 |
| Marcks    | 1.82E-03 | 7.25E-03 | 7.00E-01 | -1.43 | 1.51 | 2.16 |
| Tm9sf2    | 1.83E-03 | 7.25E-03 | 7.23E-01 | -1.38 | 1.65 | 2.29 |
| Arhgdia   | 1.86E-03 | 7.27E-03 | 7.67E-01 | -1.30 | 1.97 | 2.57 |
| Gpx3      | 2.05E-03 | 7.83E-03 | 7.13E-01 | -1.40 | 5.25 | 7.37 |
| Hnrnpa2b1 | 2.06E-03 | 7.83E-03 | 7.49E-01 | -1.34 | 2.14 | 2.86 |
| Gas6      | 2.14E-03 | 8.05E-03 | 7.25E-01 | -1.38 | 1.57 | 2.16 |
| Eno3      | 2.19E-03 | 8.09E-03 | 1.42E+00 | 1.42  | 3.13 | 2.20 |
| Actn3     | 2.24E-03 | 8.09E-03 | 1.34E+00 | 1.34  | 1.89 | 1.41 |
| Slc25a5   | 2.24E-03 | 8.09E-03 | 7.09E-01 | -1.41 | 2.06 | 2.90 |
| Car3      | 2.33E-03 | 8.31E-03 | 1.61E+00 | 1.61  | 3.46 | 2.14 |
| Eif4h     | 2.36E-03 | 8.33E-03 | 7.76E-01 | -1.29 | 2.03 | 2.61 |

|          |          |          |          |       |      |      |
|----------|----------|----------|----------|-------|------|------|
| Gnas     | 2.47E-03 | 8.59E-03 | 7.54E-01 | -1.33 | 4.68 | 6.20 |
| Itm2c    | 2.50E-03 | 8.59E-03 | 7.36E-01 | -1.36 | 2.21 | 3.00 |
| Ssr3     | 2.57E-03 | 8.63E-03 | 7.07E-01 | -1.42 | 1.89 | 2.67 |
| Hsp90b1  | 2.57E-03 | 8.63E-03 | 7.65E-01 | -1.31 | 4.03 | 5.27 |
| Myl12a   | 2.60E-03 | 8.63E-03 | 7.26E-01 | -1.38 | 2.65 | 3.65 |
| Nadk     | 2.68E-03 | 8.72E-03 | 6.69E-01 | -1.49 | 1.68 | 2.51 |
| Mgp      | 2.68E-03 | 8.72E-03 | 4.91E-01 | -2.04 | 2.69 | 5.49 |
| BC005537 | 2.76E-03 | 8.86E-03 | 7.10E-01 | -1.41 | 2.01 | 2.84 |
| Tnfaip2  | 2.83E-03 | 8.98E-03 | 7.14E-01 | -1.40 | 2.06 | 2.88 |
| Sept2    | 3.13E-03 | 9.82E-03 | 7.59E-01 | -1.32 | 2.14 | 2.82 |
